# Supplementary material for: Design, synthesis and biological activity of peptidyl β-nitrostyrenes as cysteine protease inhibitors against Leishmania donovani
Source: Royal Society of Chemistry journal article supplement (doi:10.1039/d4ra06510g), 2025-01-01

## Design, synthesis and biological activity of peptidyl $\beta$ -nitrostyrenes as Cysteine Protease Inhibitors against *Leishmania Donovanii*

Sweta Sharma,<sup>[a]</sup> Mirza A. Beg,<sup>[c]</sup> Insha Latief,<sup>[a]</sup> Jyoti Aboti,<sup>[a]</sup> Samra Jamal,<sup>[e]</sup> Supriya Tanwar,<sup>[d]</sup> Kalicharan Sharma<sup>[e]</sup>,  
Sayeed ur Rehman<sup>[d],\*</sup>, Angamuthu Selvapandiyar,<sup>[c],\*</sup> and Syed Shafi.<sup>[a],\*</sup>

<sup>a</sup>Department of Chemistry, School of Chemical and Life Sciences, Jamia Hamdard, New Delhi, India;

<sup>b</sup>Department of Pharmaceutical Chemistry, School of Pharmaceutical Education and Research, Jamia Hamdard, New Delhi 110062, India;

<sup>c</sup>Department of Chemistry, School of Chemical and Life Sciences, Jamia Hamdard, New Delhi, India;

<sup>d</sup>Department of Biochemistry, School of Chemical and Life Sciences, Jamia Hamdard, New Delhi, India;

<sup>e</sup>Department of Biotechnology, School of Chemical and Life Sciences, Jamia Hamdard, New Delhi, India.

# Spectral Images

Sample code:SSPEP1

VARIAN 400MHz NMR  
Solvent: CDCl3  
Date:Jul 23 2021

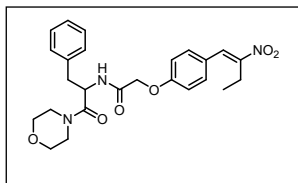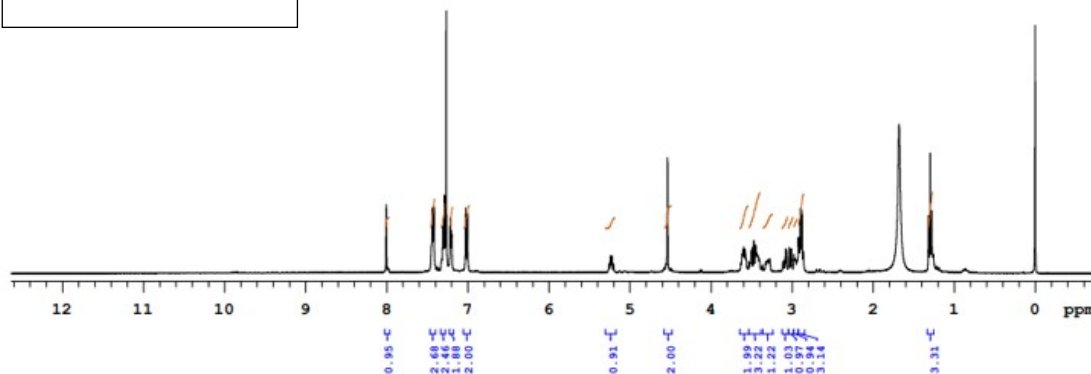

<sup>1</sup>H NMR spectra of the compound 14a

## Expanded:

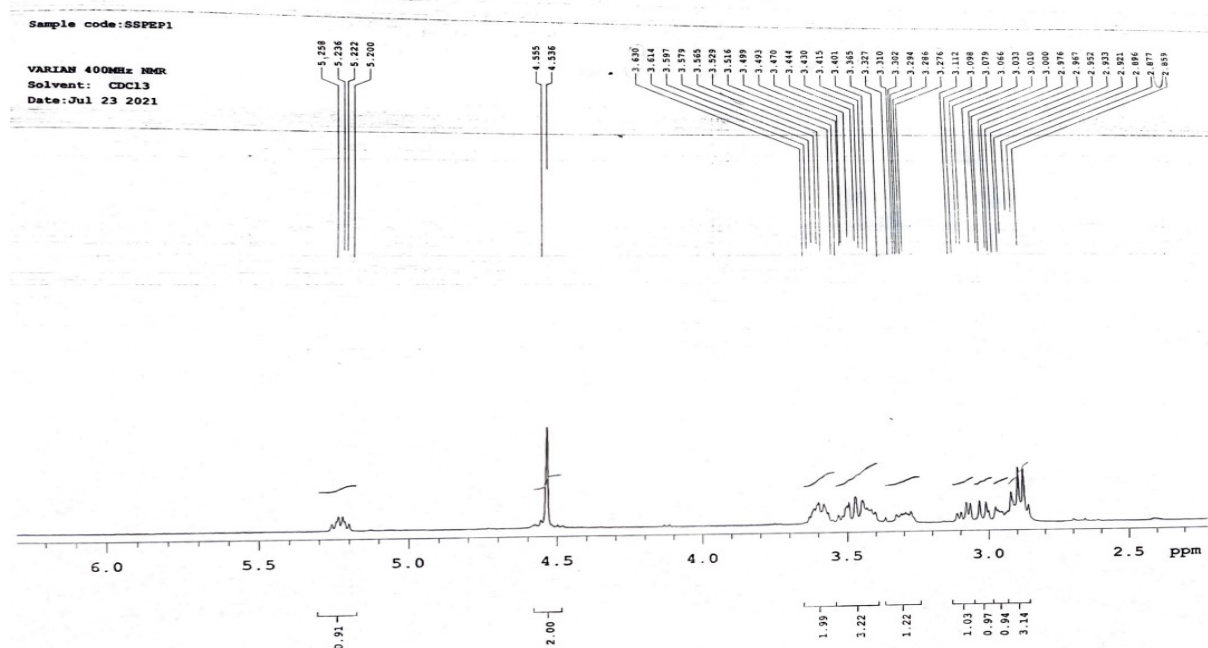

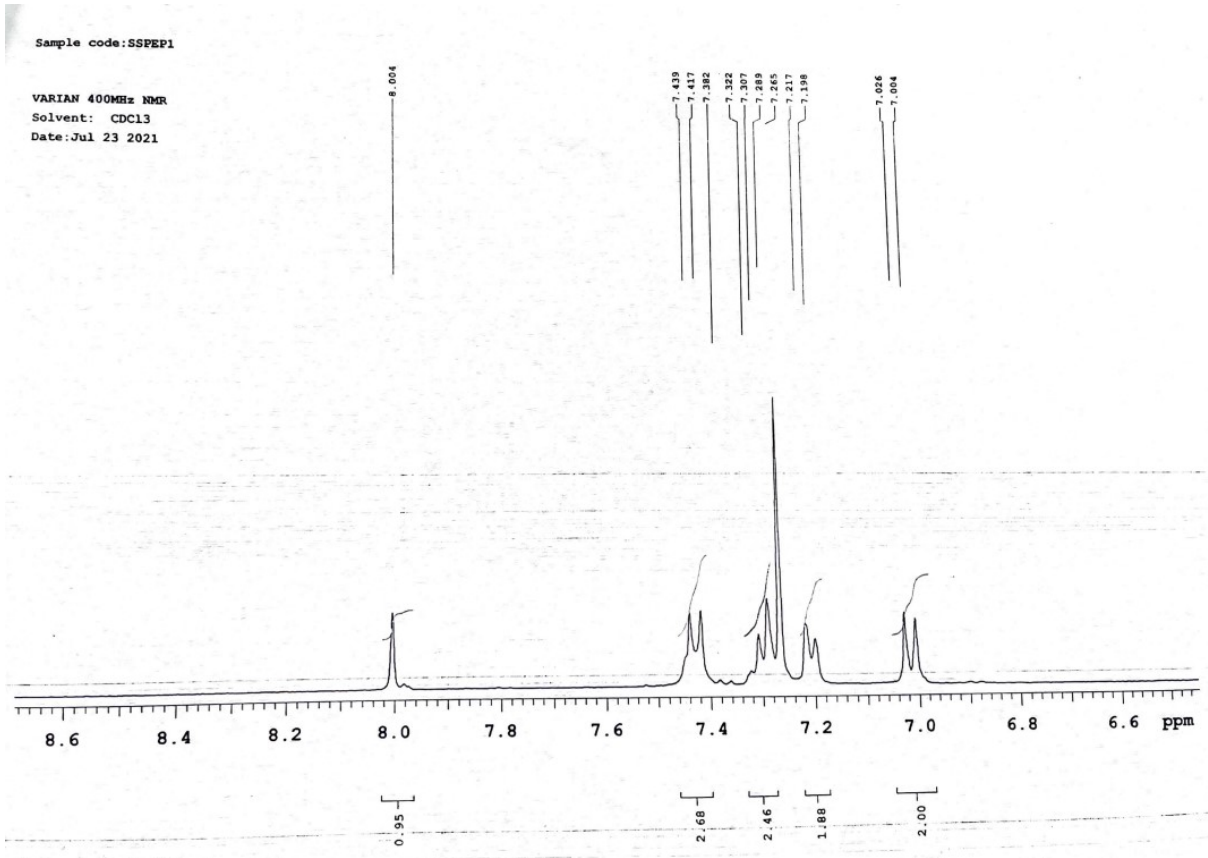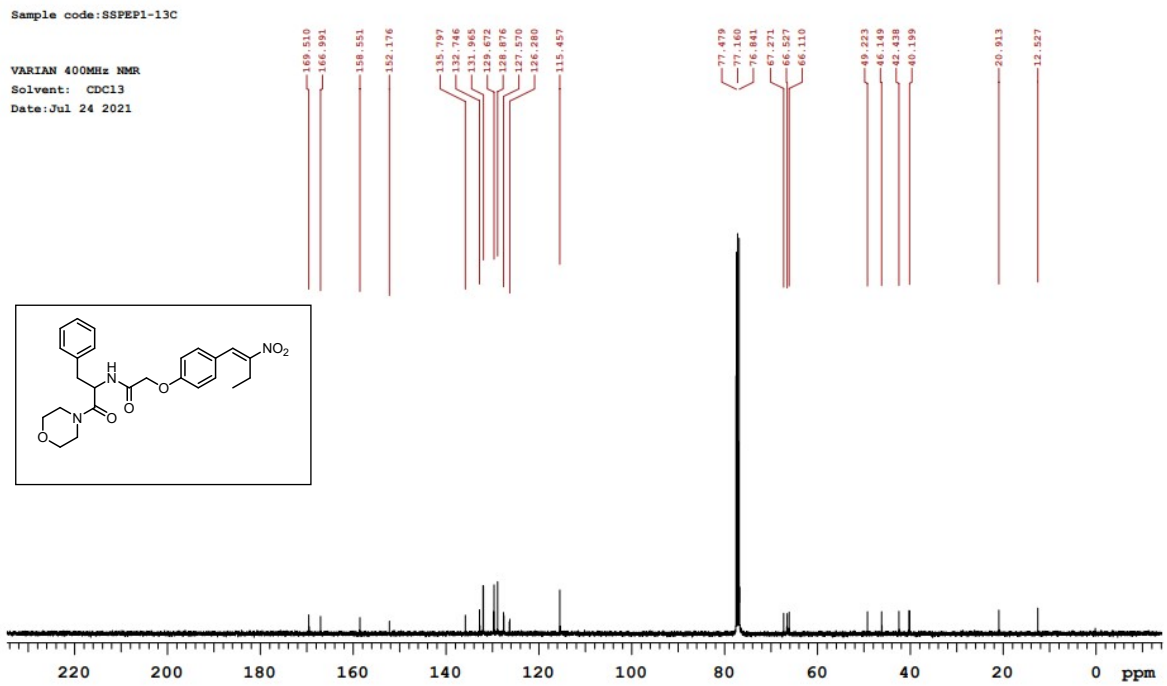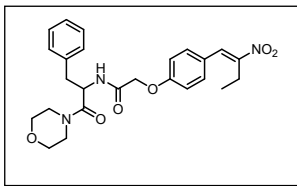

<sup>13</sup>C NMR spectra of the compound 14a

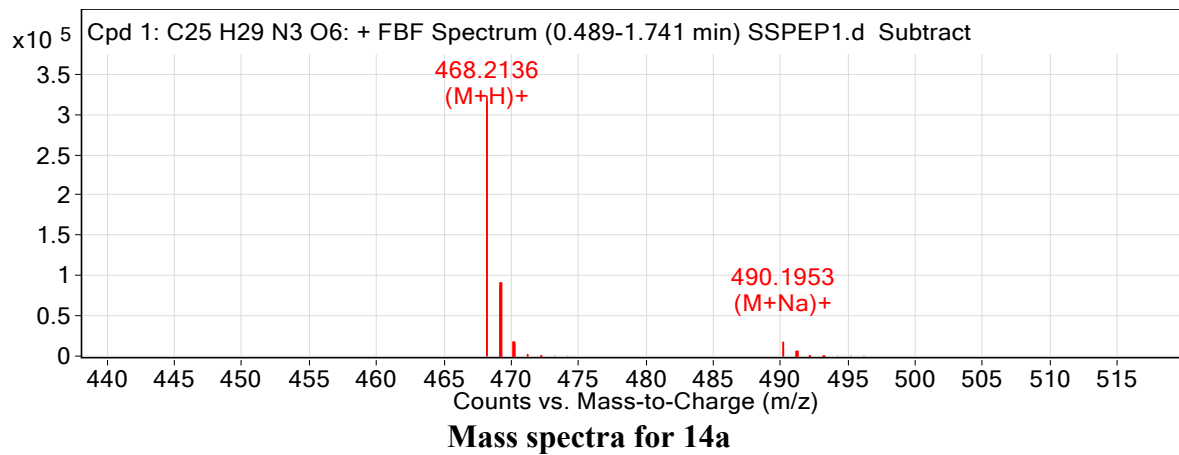

Sample code: SSPEP2

VARIAN 400MHz NMR  
Solvent: CDCl<sub>3</sub>  
Date: Jul 23 2021

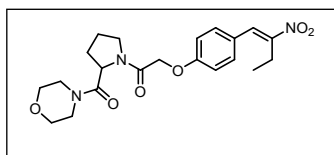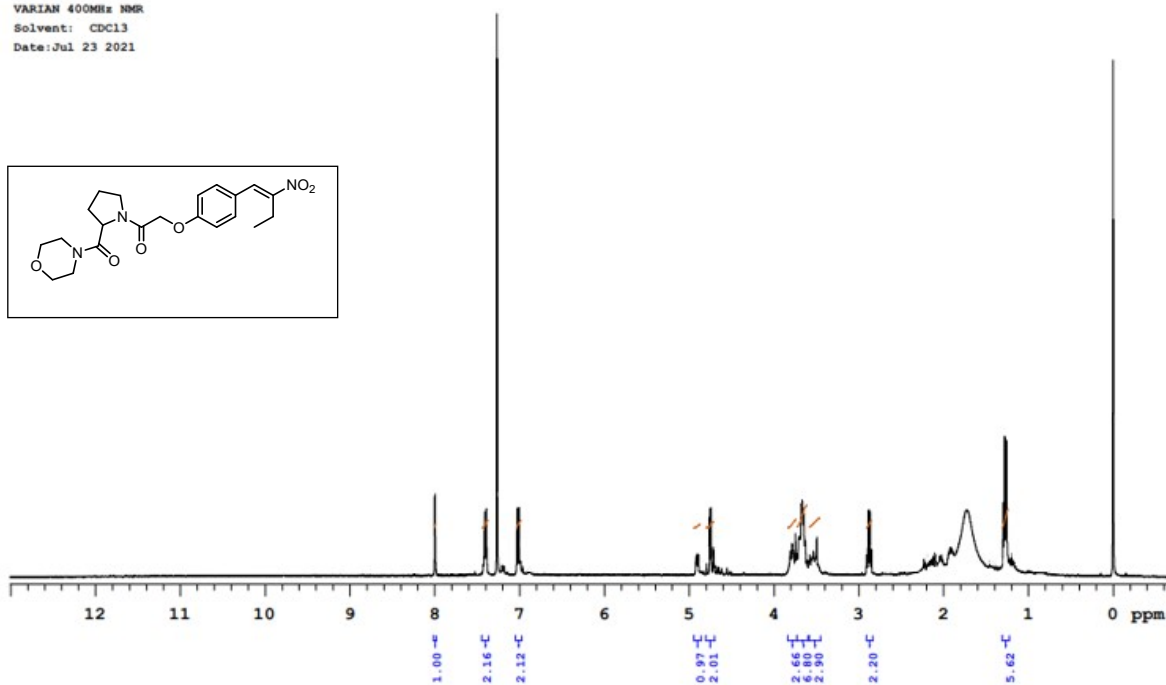

<sup>1</sup>H NMR spectra of the compound 14b

# Expanded:

Sample code:SSPEP2

VARIAN 400MHz NMR  
Solvent: CDCl3  
Date:Jul 23 2021

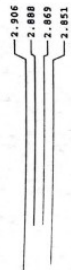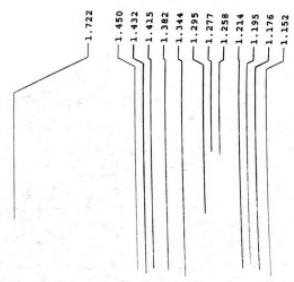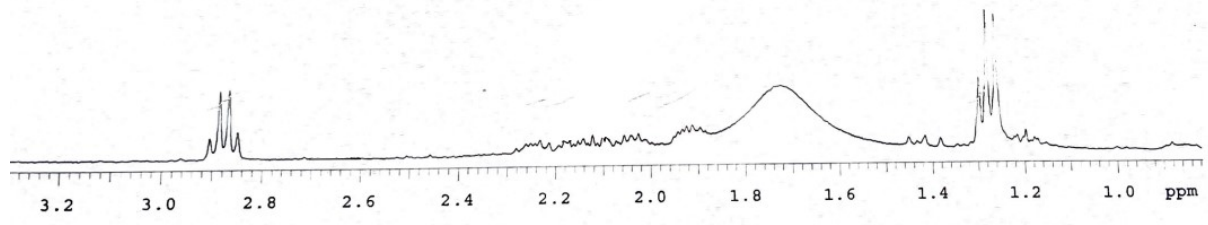

Sample code:SSPEP2

VARIAN 400MHz NMR  
Solvent: CDCl3  
Date:Jul 23 2021

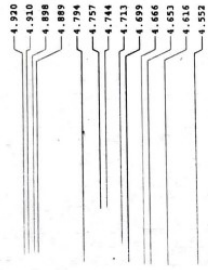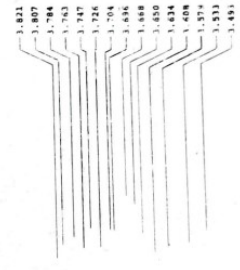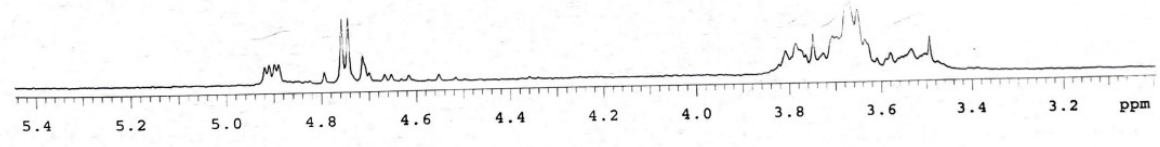

Sample code:SSPEP2

VARIAN 400MHz NMR  
Solvent: CDCl3  
Date:Jul 23 2021

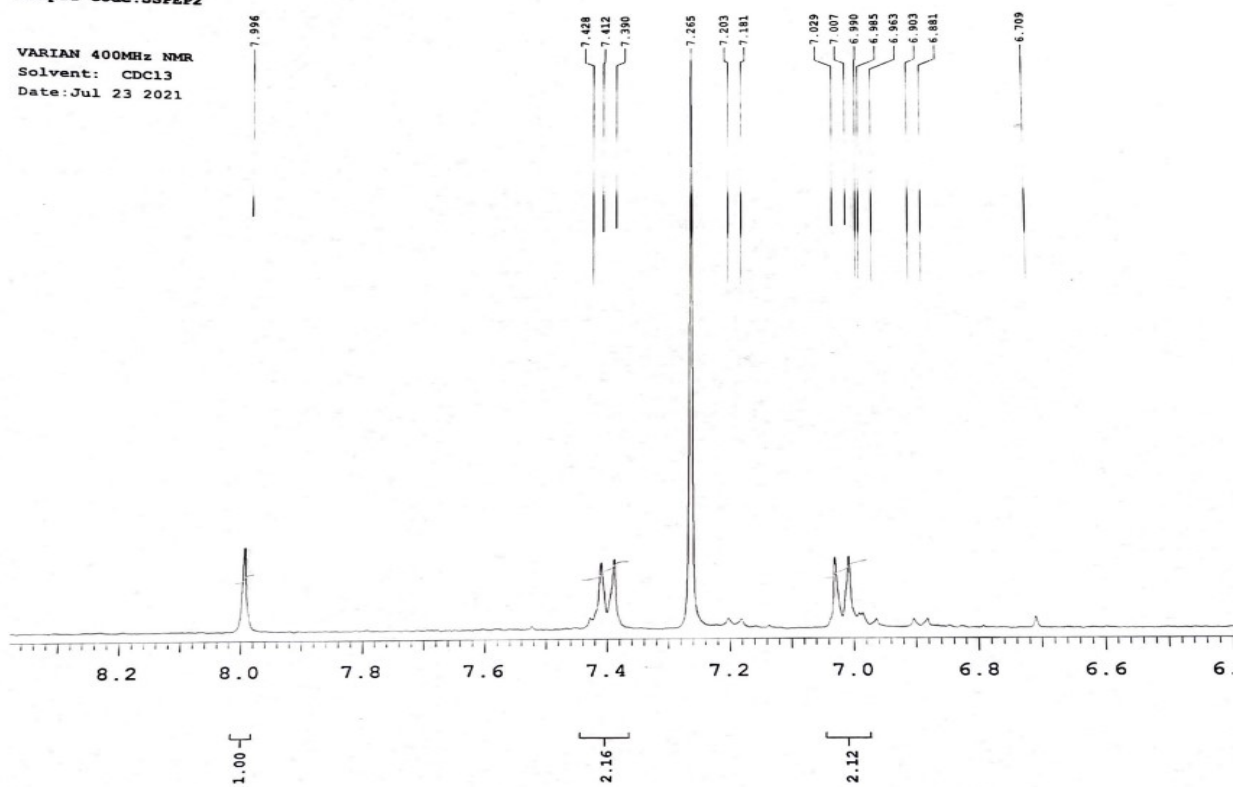

Sample code:SSPEP2-13C

<sup>13</sup>C NMR

VARIAN 400MHz NMR  
Solvent: CDCl3  
Date:Jul 23 2021

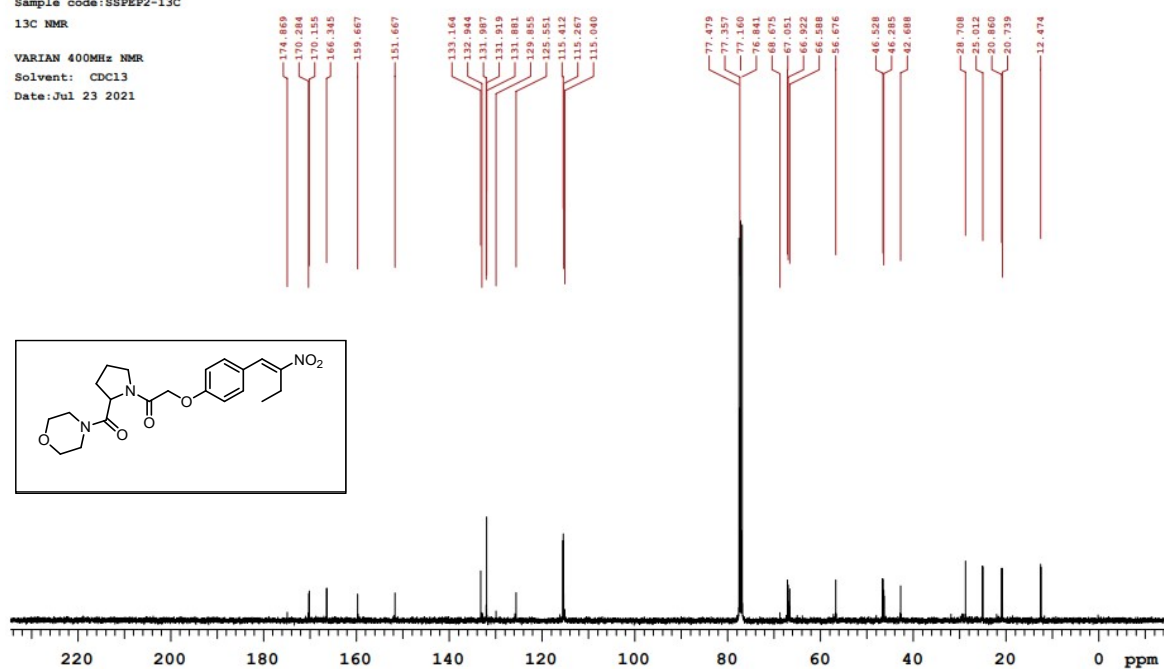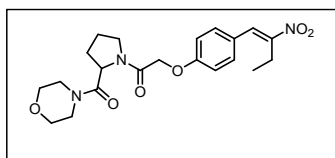

<sup>13</sup>C NMR spectra of the compound 14b

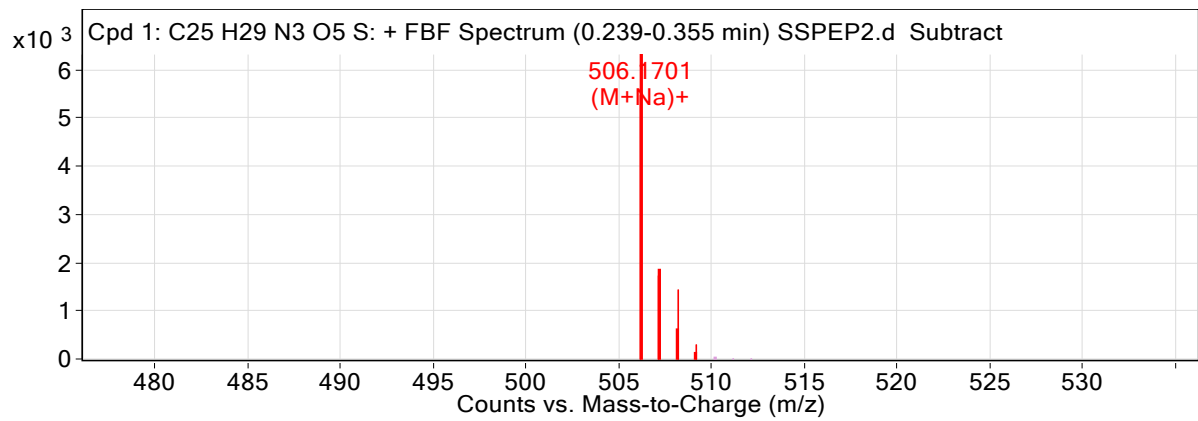

Mass spectra for the compound 14b

Sample code:SSPEP3

VARIAN 400MHz NMR  
Solvent: CDC13  
Date:Jul 23 2021

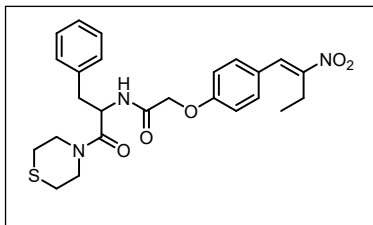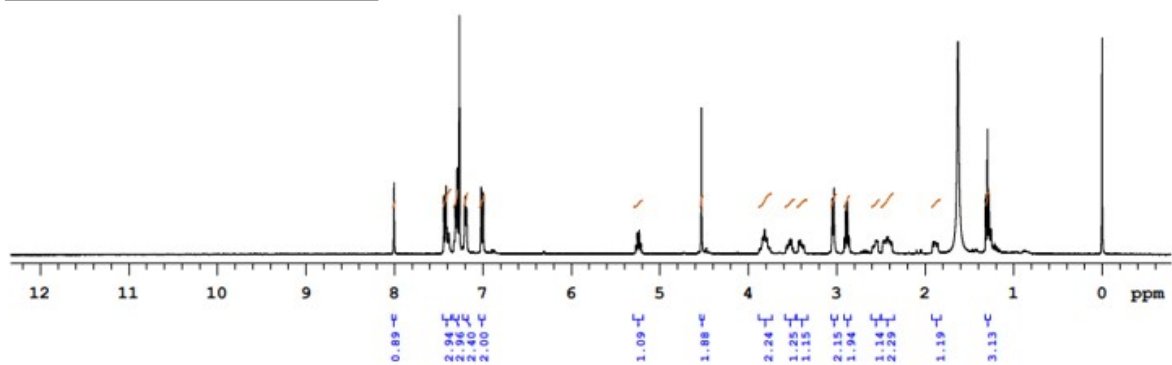

<sup>1</sup>H NMR spectra of the compound 14c

# Expanded:

Sample code:SSPEP3

VARIAN 400MHz NMR  
Solvent: CDCl3  
Date:Jul 23 2021

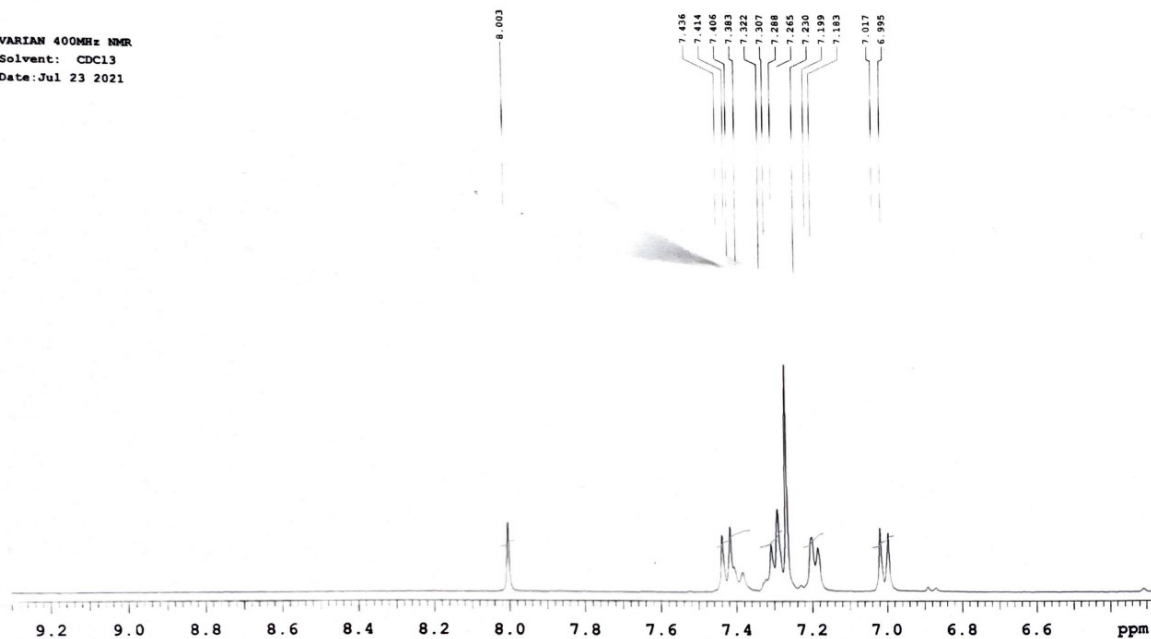

Sample code:SSPEP3

VARIAN 400MHz NMR  
Solvent: CDCl3  
Date:Jul 23 2021

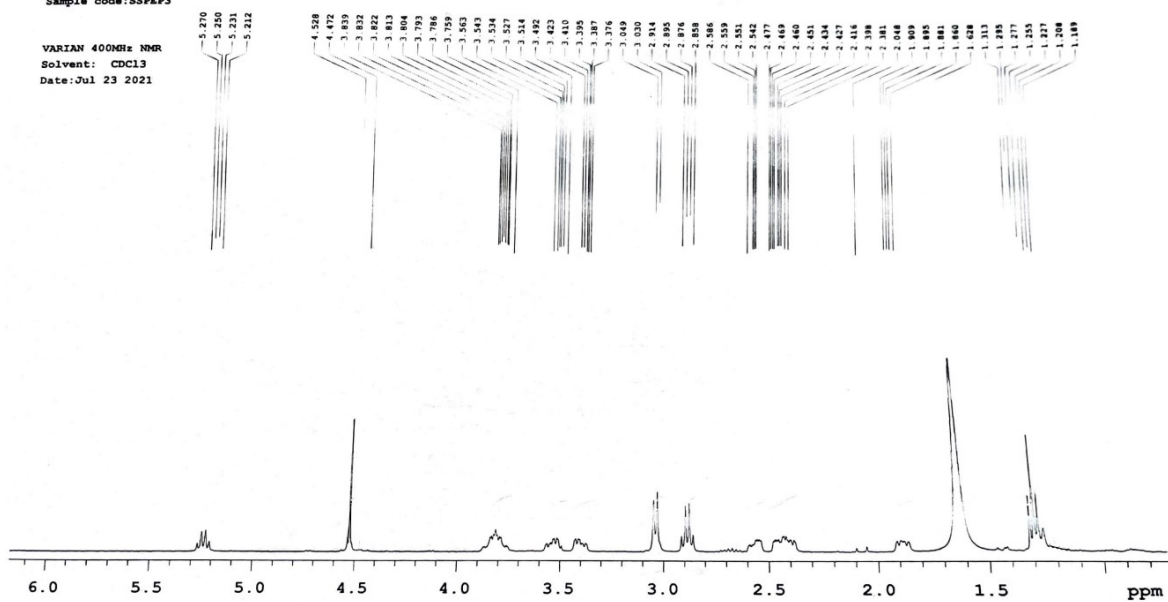



Sample code: SSPEP3-13C

VARIAN 400MHz NMR  
Solvent: CDCl3  
Date: Jul 24 2021

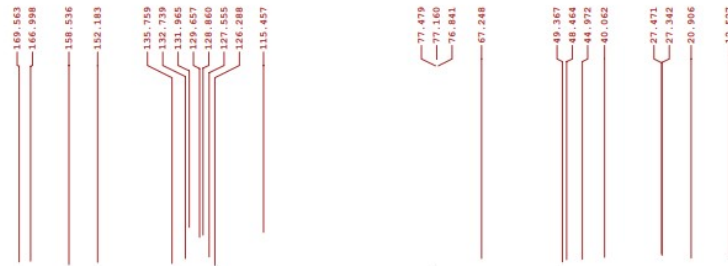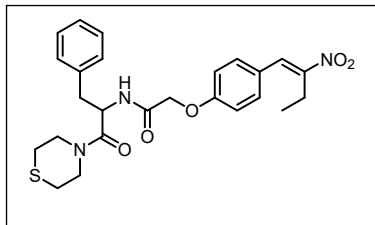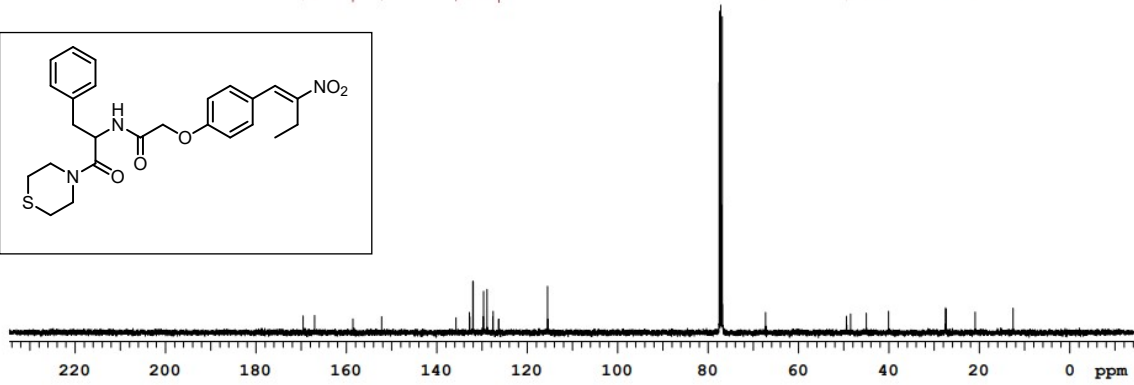

<sup>13</sup>C NMR spectra of the compound 14c

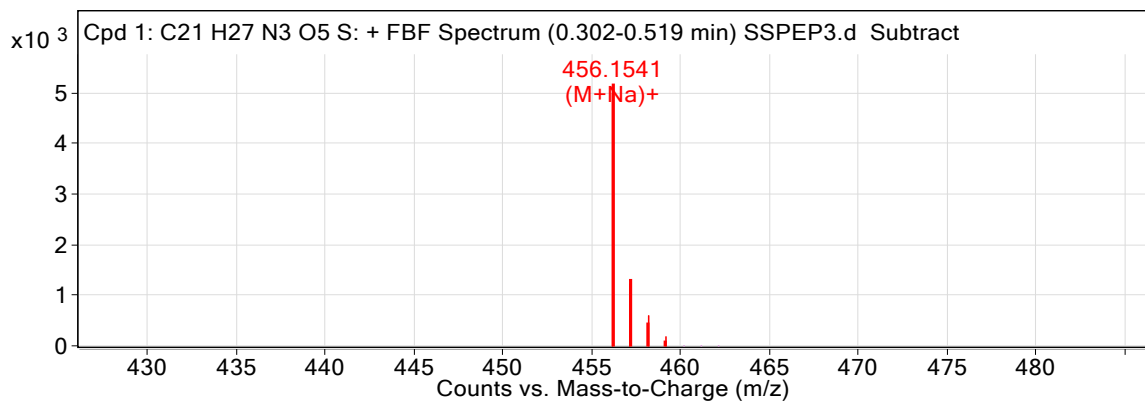

Mass spectra for the compound 14c

M

Nov18-2022.5.fid  
SSPEP-7  
PROTON DMSO (D:\data\SPS) nmrsu 3

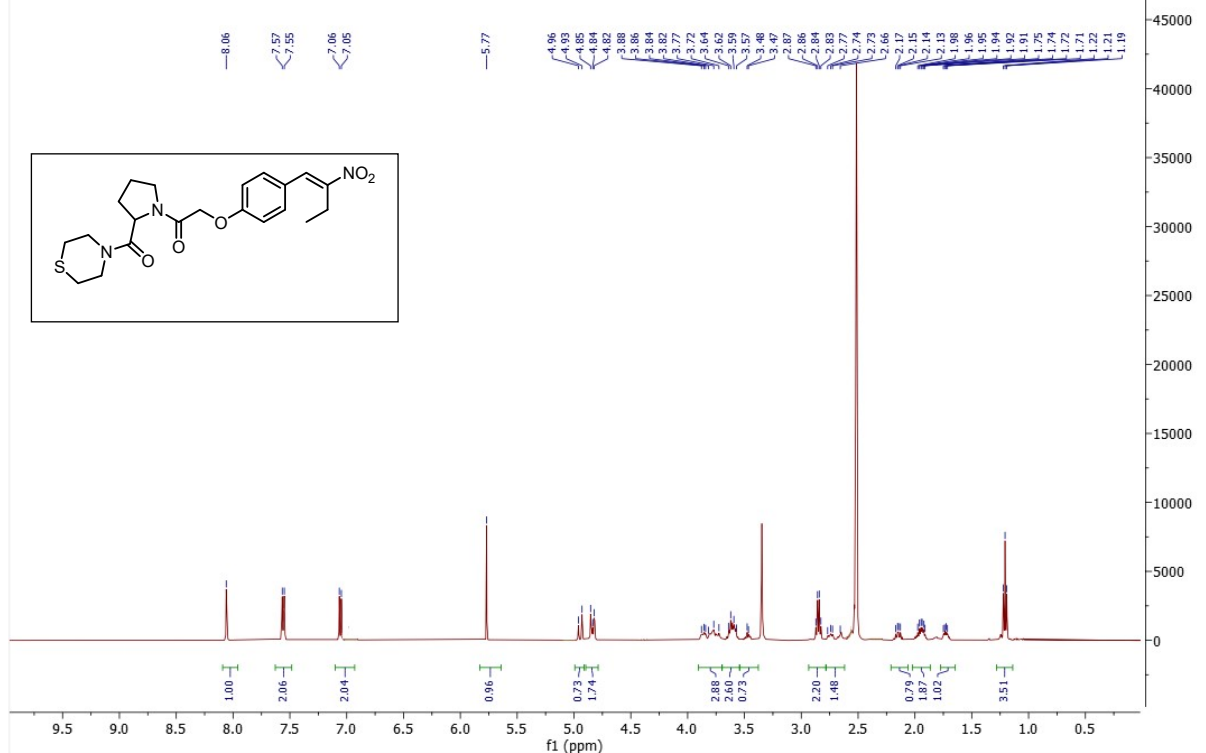

**<sup>1</sup>H NMR spectra of the compound 14d**

### Expanded:

Nov18-2022.5.fid  
SSPEP-7  
PROTON DMSO (D:\data\SPS) nmrsu 3

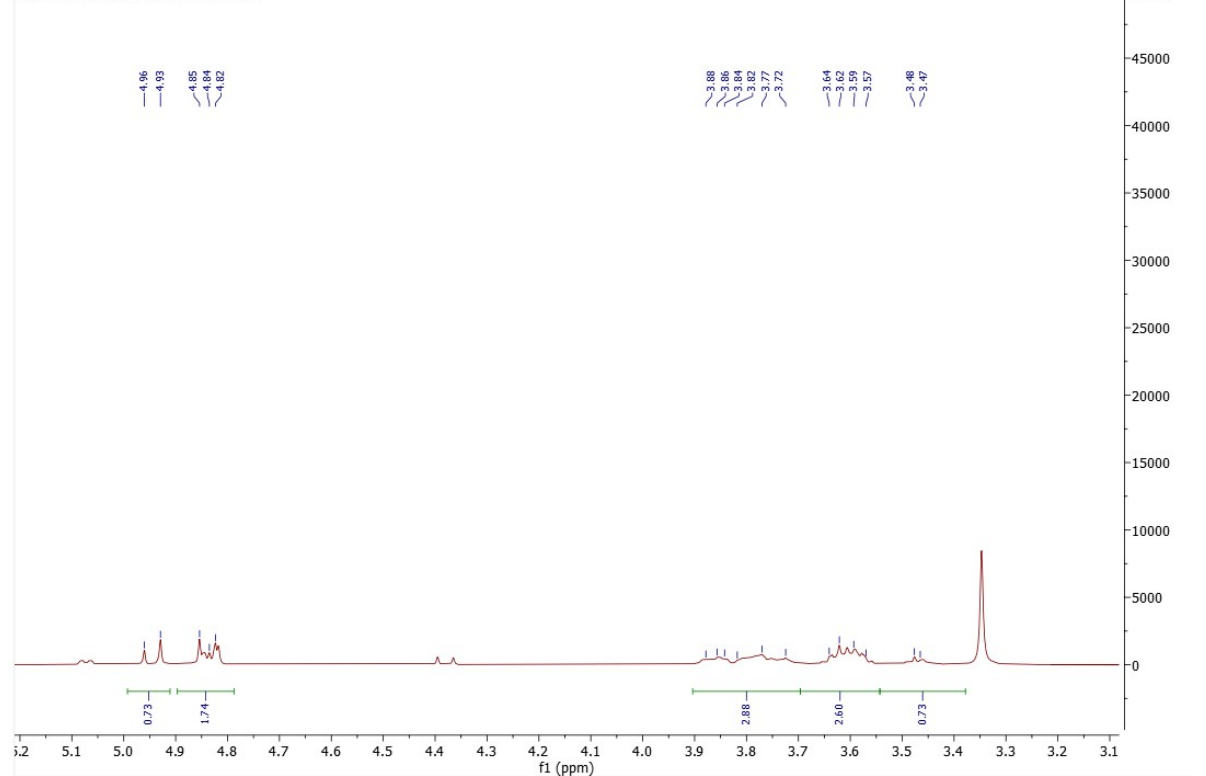

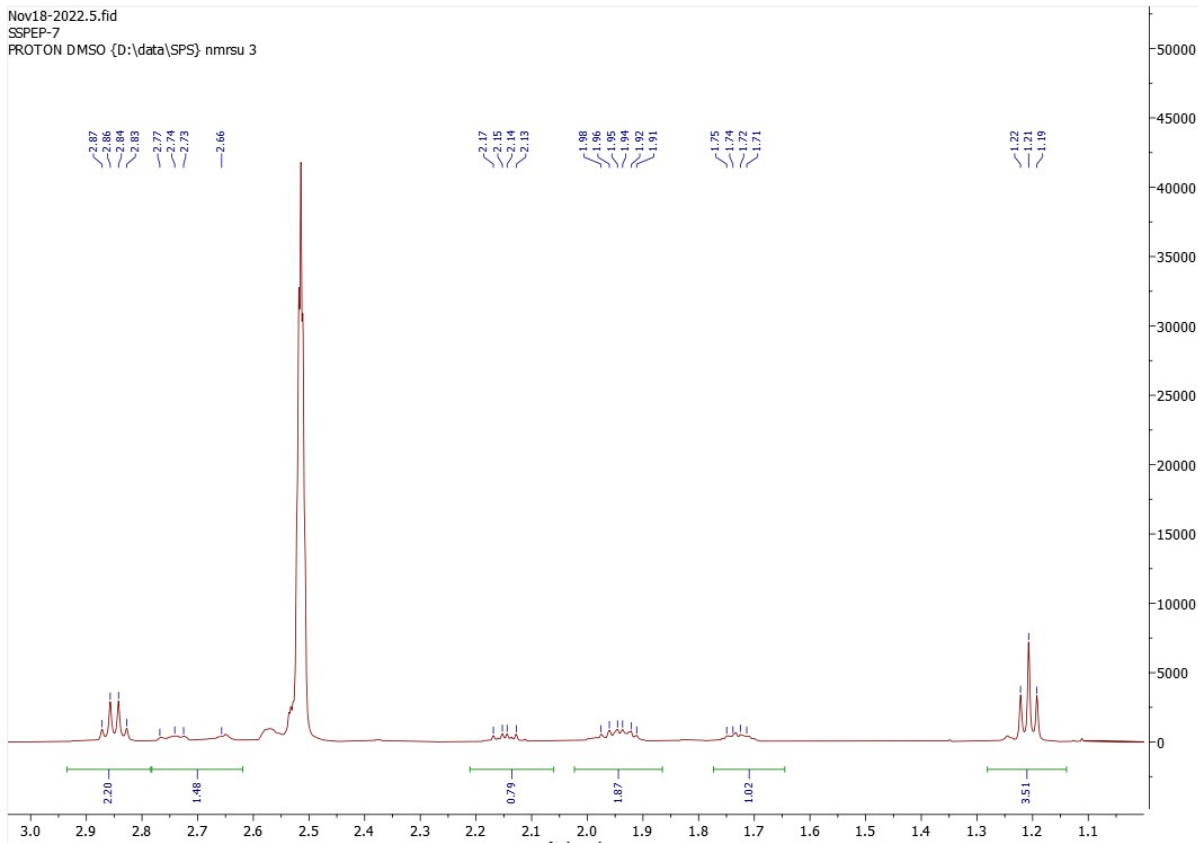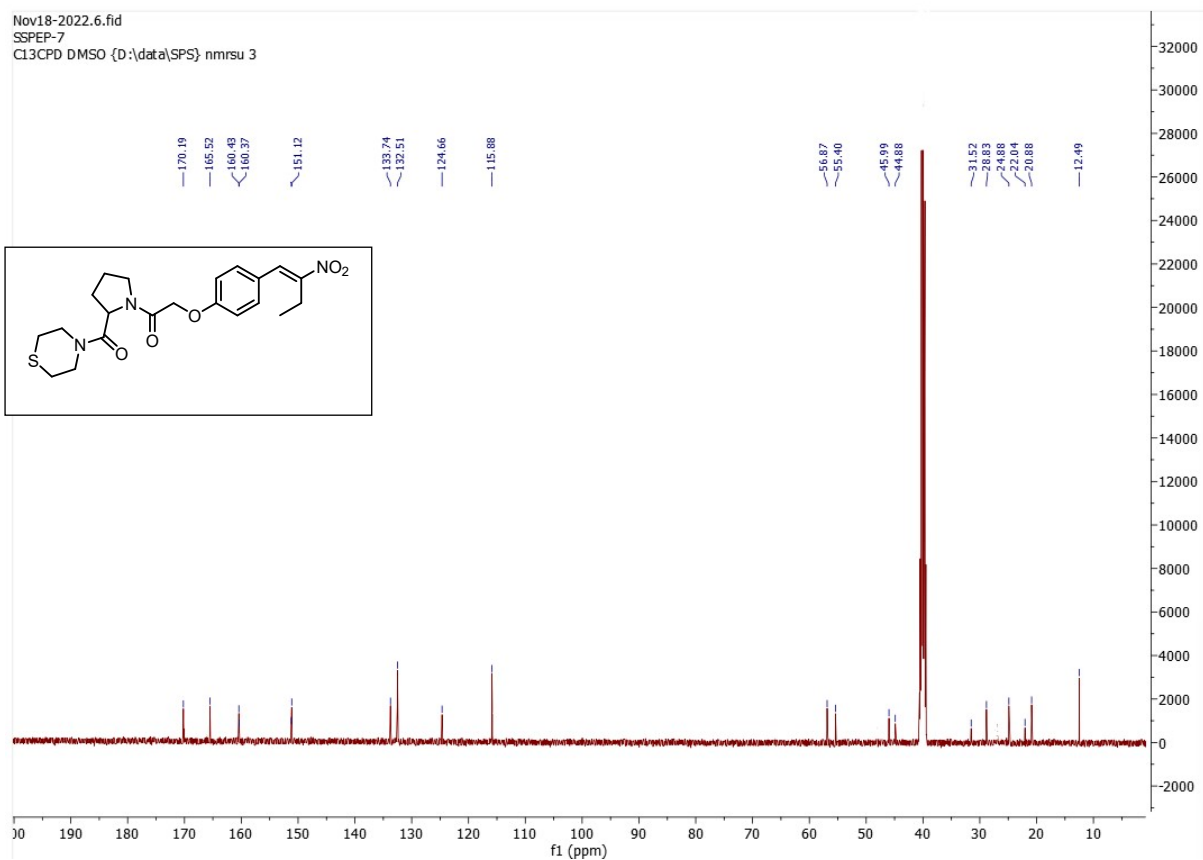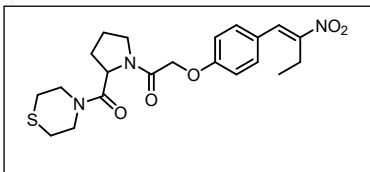

**<sup>13</sup>C NMR spectra of the compound 14d**

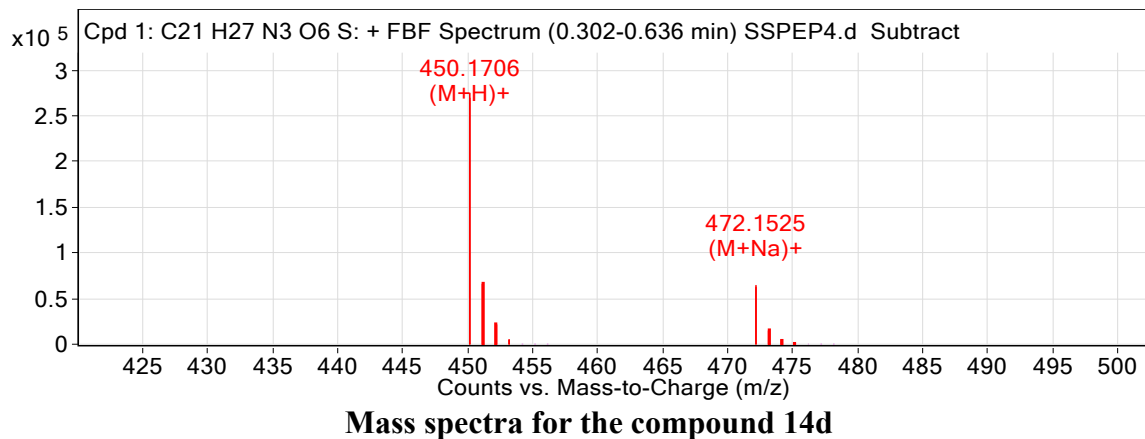

Sample code:SSPEP7

VARIAN 400MHz NMR  
 Solvent: CDCl3  
 Date:Jul 23 2021

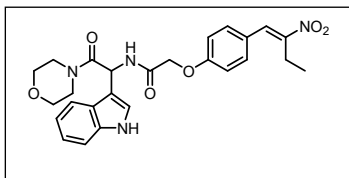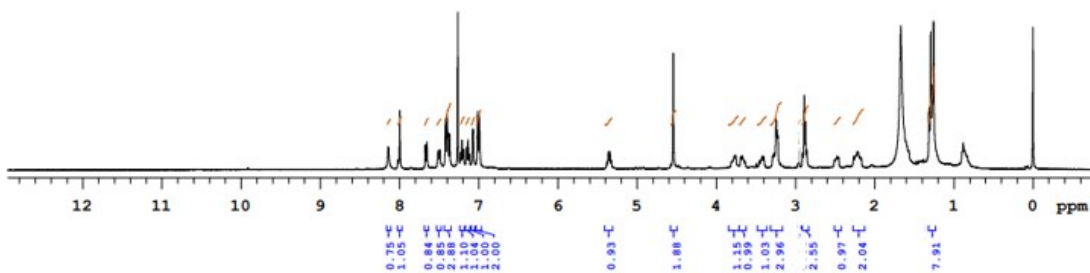

# Expanded:

Sample code:SSPEP7

VARIAN 400MHz NMR  
Solvent: CDCl3  
Date:Jul 23 2021

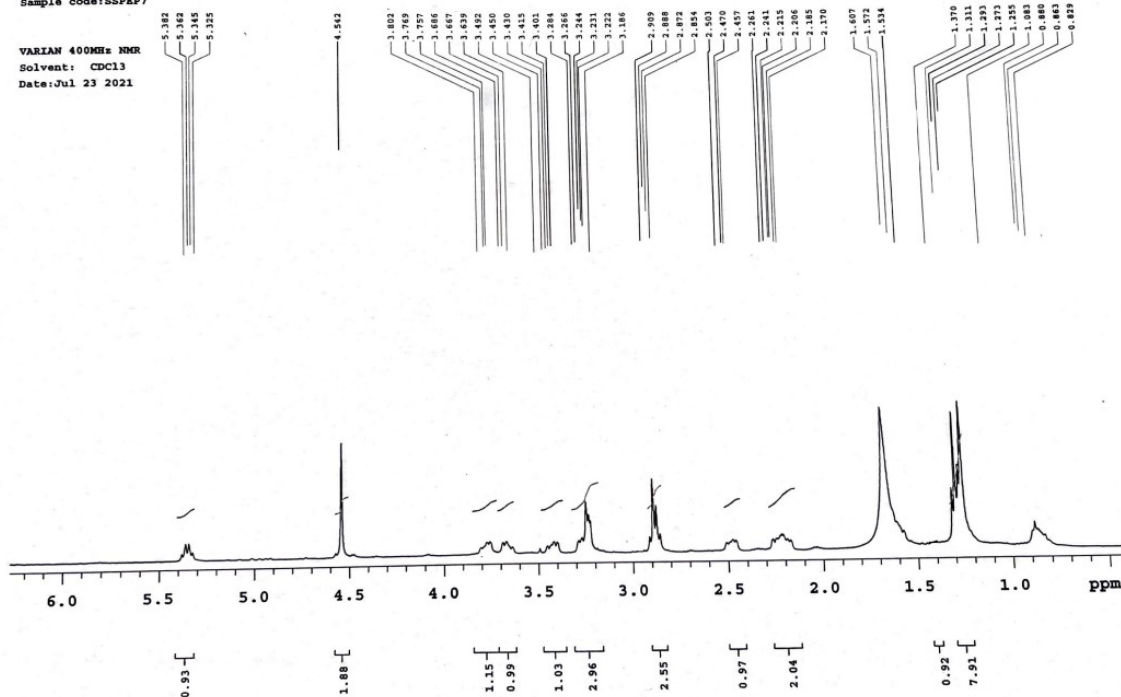

Sample code:SSPEP7

VARIAN 400MHz NMR  
Solvent: CDCl3  
Date:Jul 23 2021

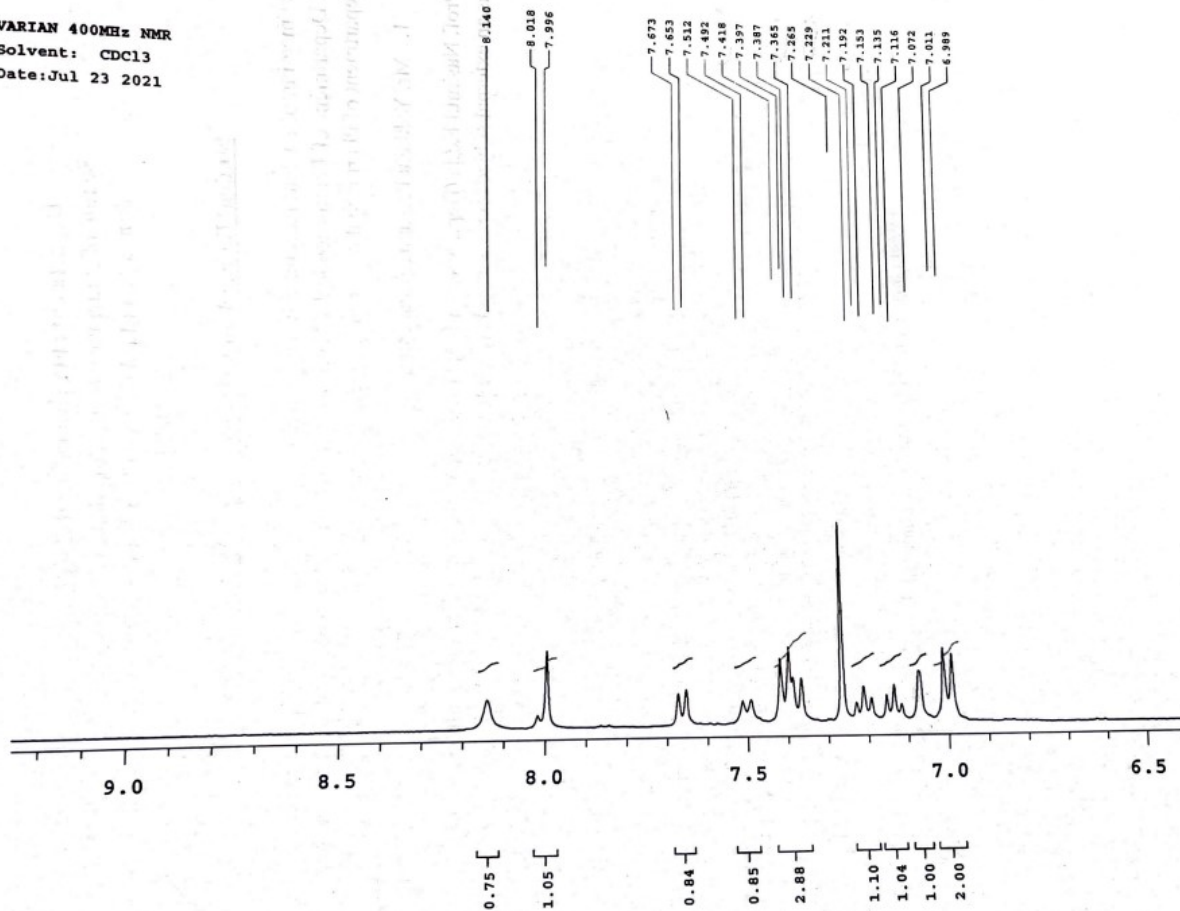

Sample code:SSPEP7-13C  
13C NMR

VARIAN 400MHz NMR  
Solvent: CDCl3  
Date:Jul 23 2021

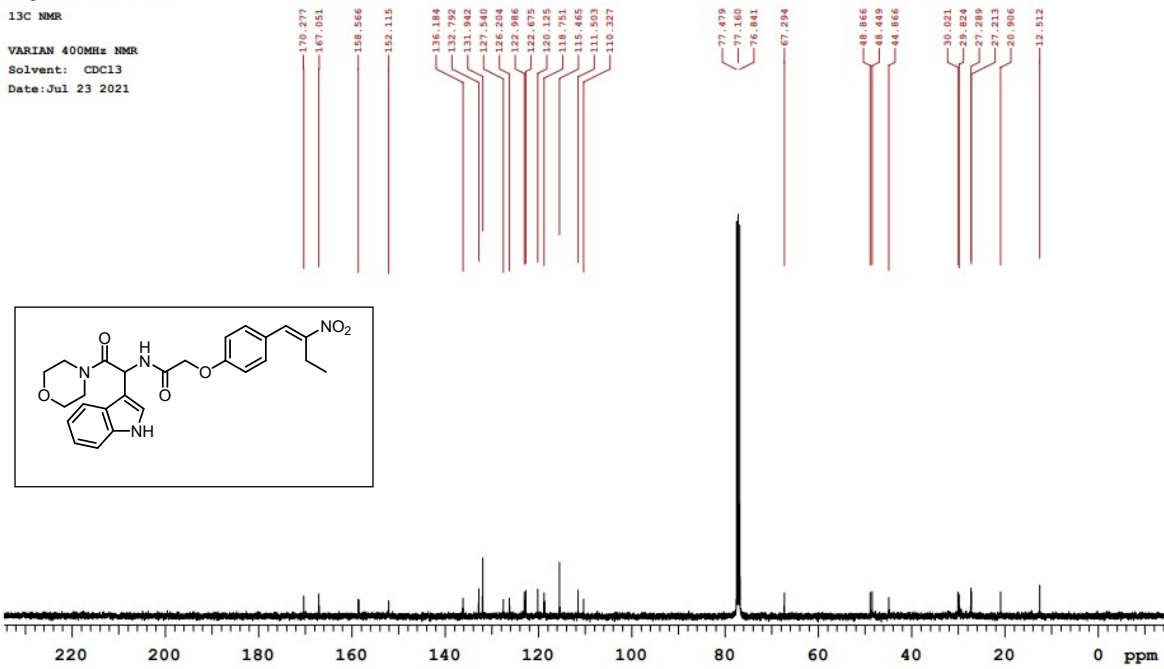

**<sup>13</sup>C NMR spectra of the compound 14e**

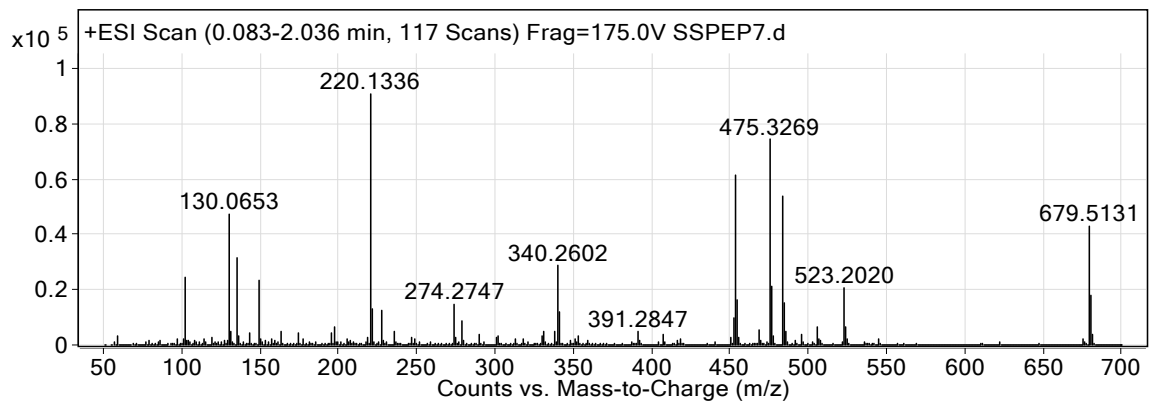

**Mass spectra for the compound 14e**

Sample code:SSPEP12

VARIAN 400MHz NMR

Solvent: CDCl3

Date:Jul 23 2021

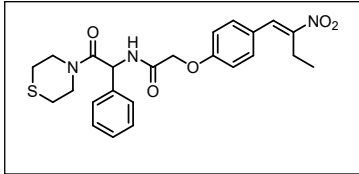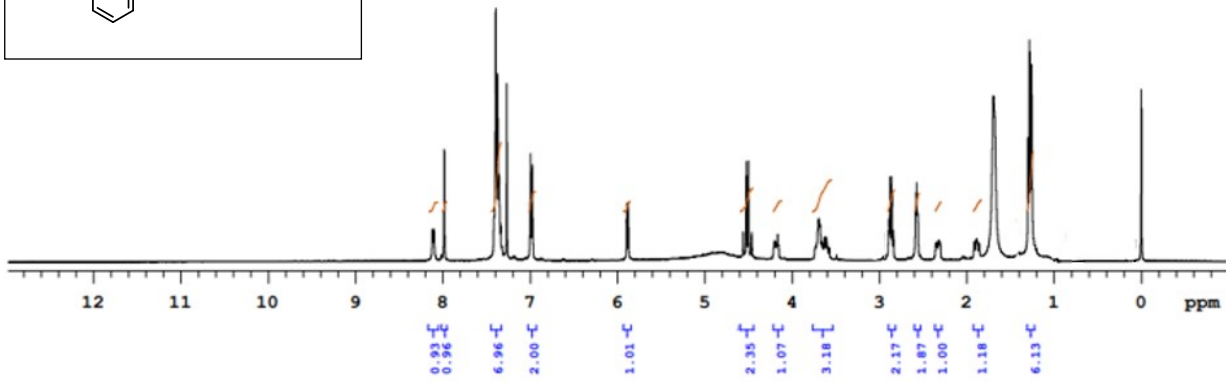

<sup>1</sup>H NMR spectra of the compound 14f

Expanded:

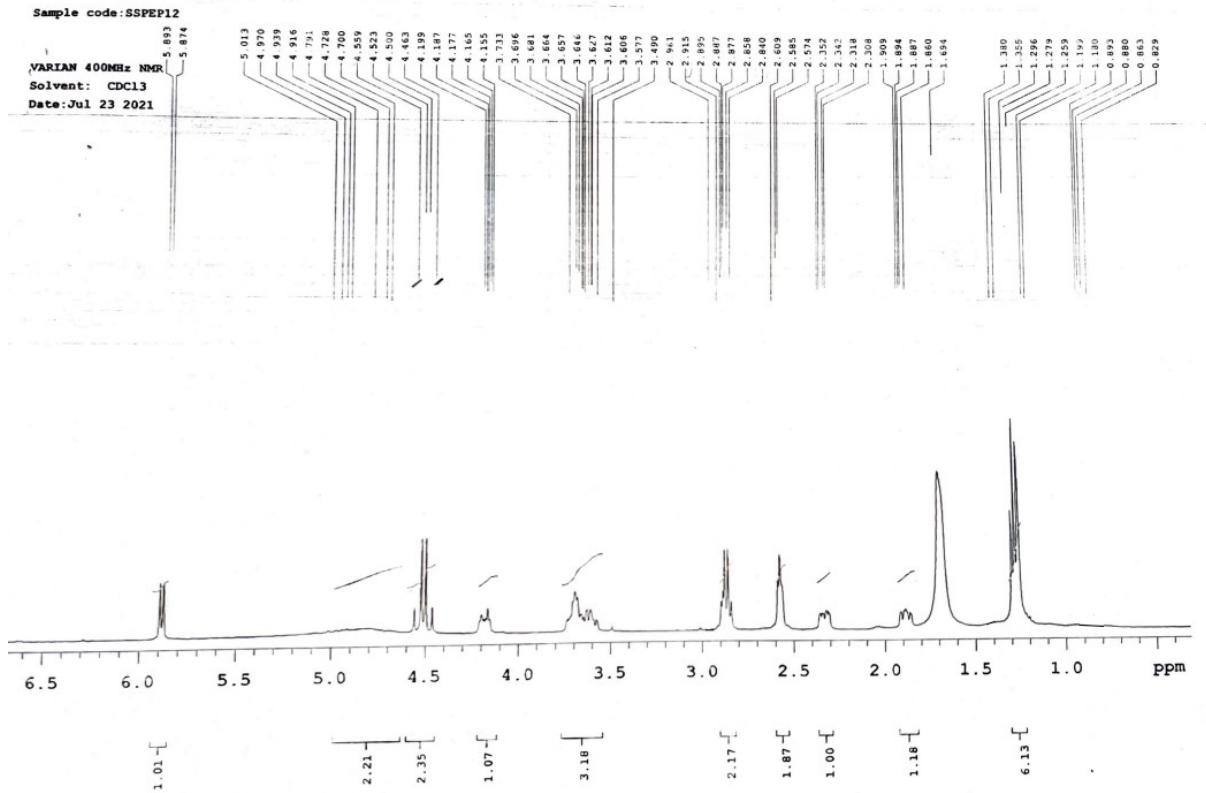

Sample code:SSPEP12

VARIAN 400MHz NMR  
Solvent: CDCl3  
Date:Jul 23 2021

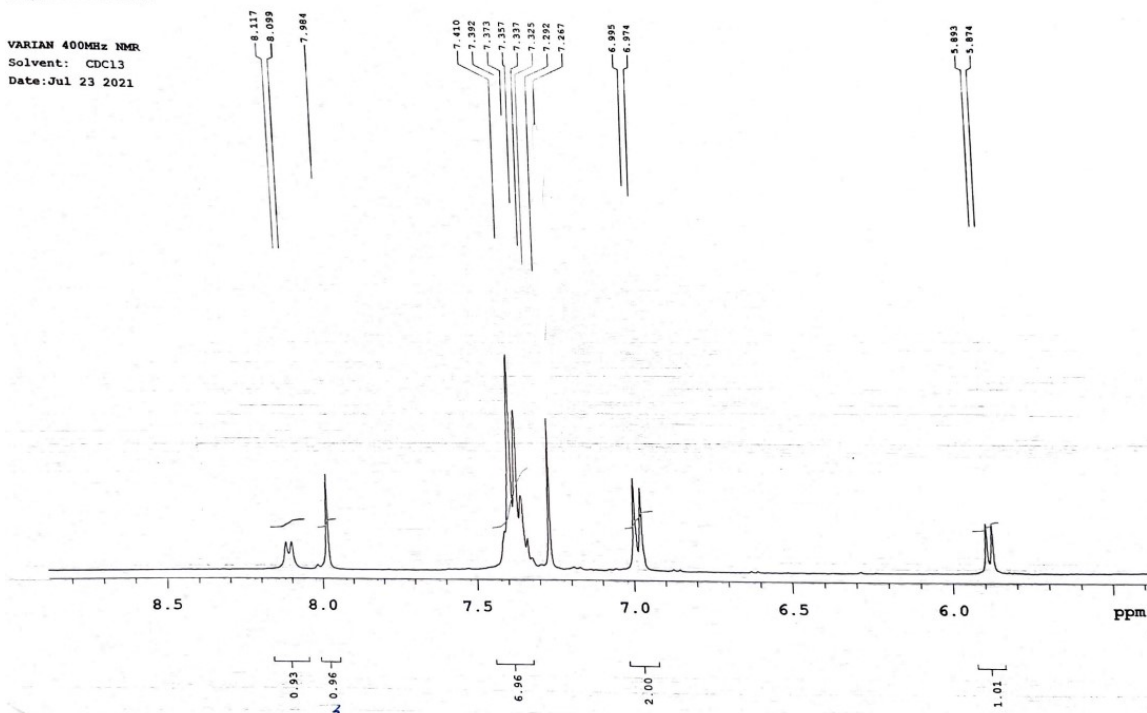

Sample code:SSPEP12-13C

<sup>13</sup>C NMR

VARIAN 400MHz NMR  
Solvent: CDCl3  
Date:Jul 23 2021

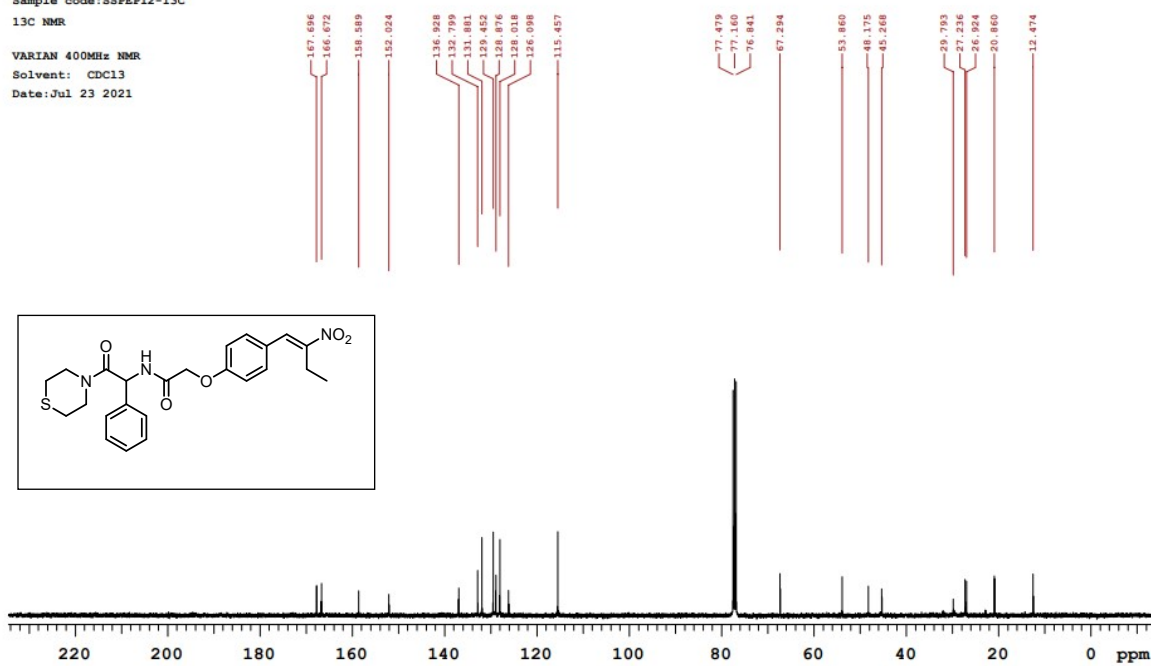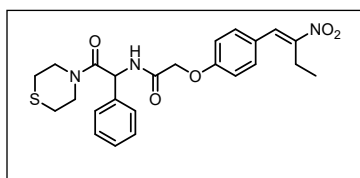

<sup>13</sup>C NMR spectra of the compound 14f



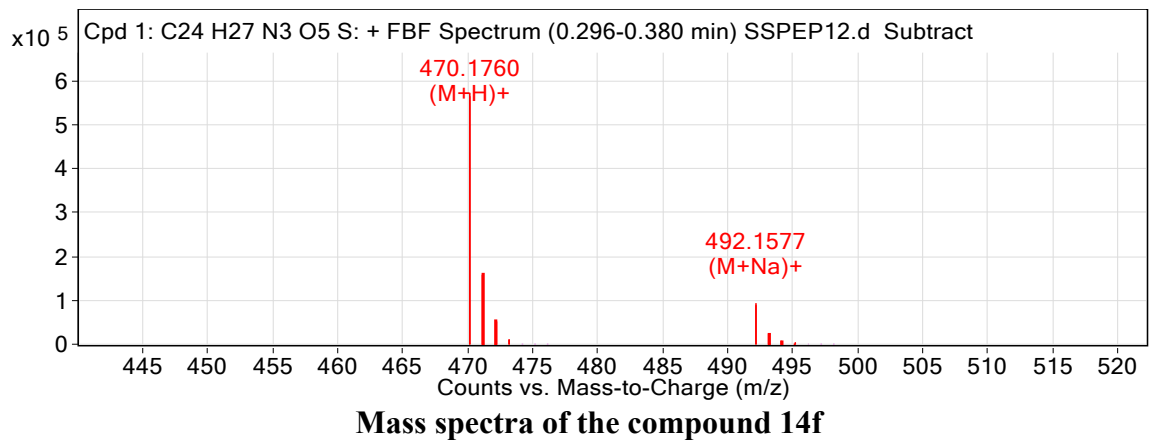

Sample code:SSPEP13

VARIAN 400MHz NMR  
Solvent: CDCl<sub>3</sub>  
Date:Jul 23 2021

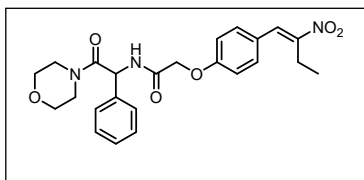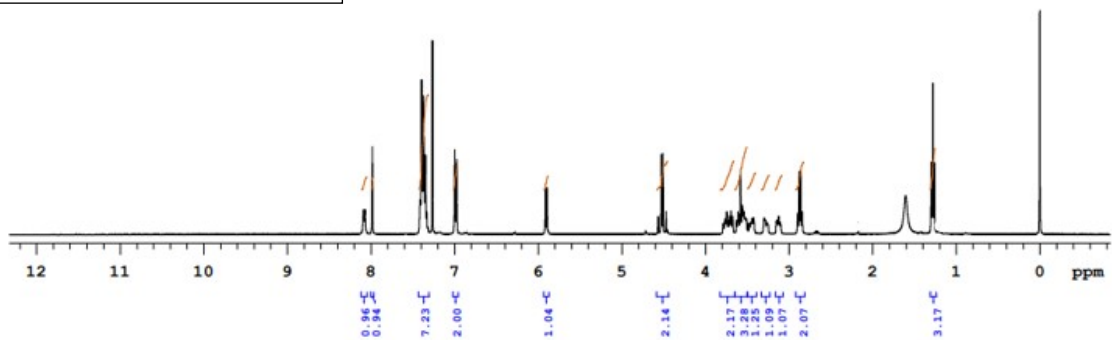

<sup>1</sup>H NMR spectra of the compound 14g

# Expanded:

Sample code:SSPEP13

VARIAN 400MHz NMR  
Solvent: CDCl3  
Date:Jul 23 2021

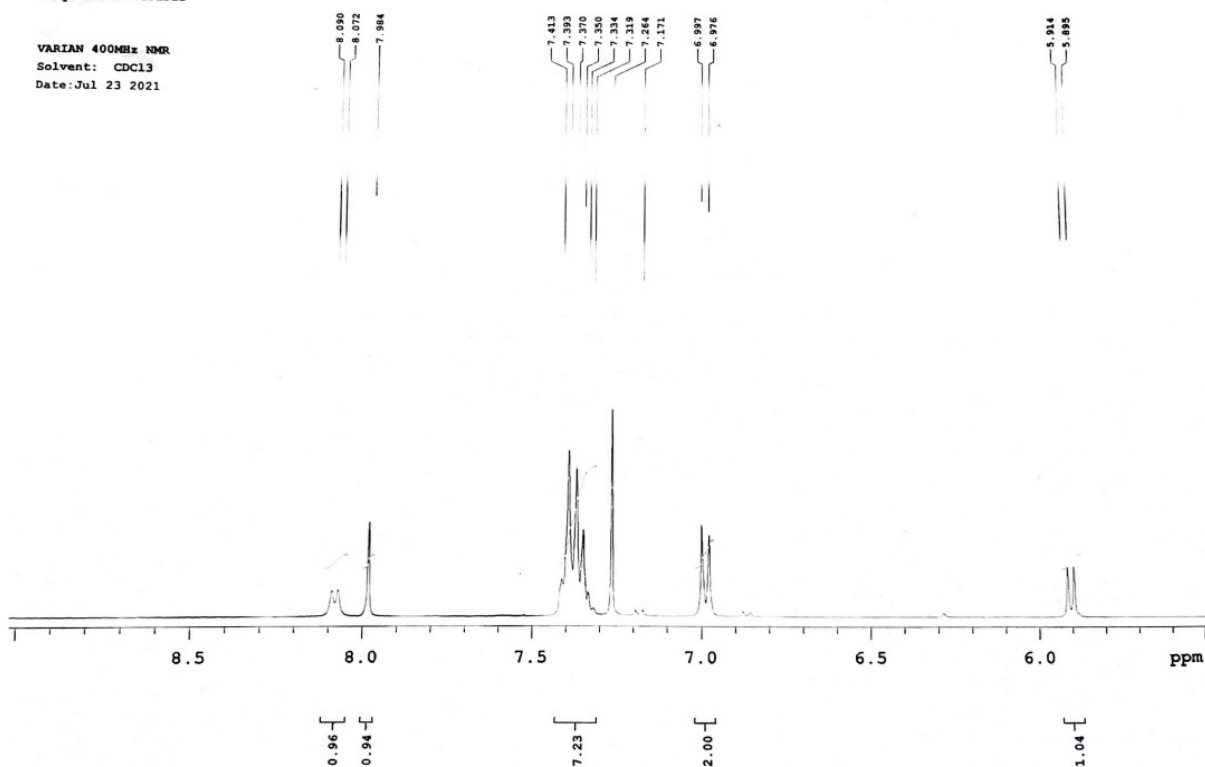

Sample code:SSPEP13

VARIAN 400MHz NMR  
Solvent: CDCl3  
Date:Jul 23 2021

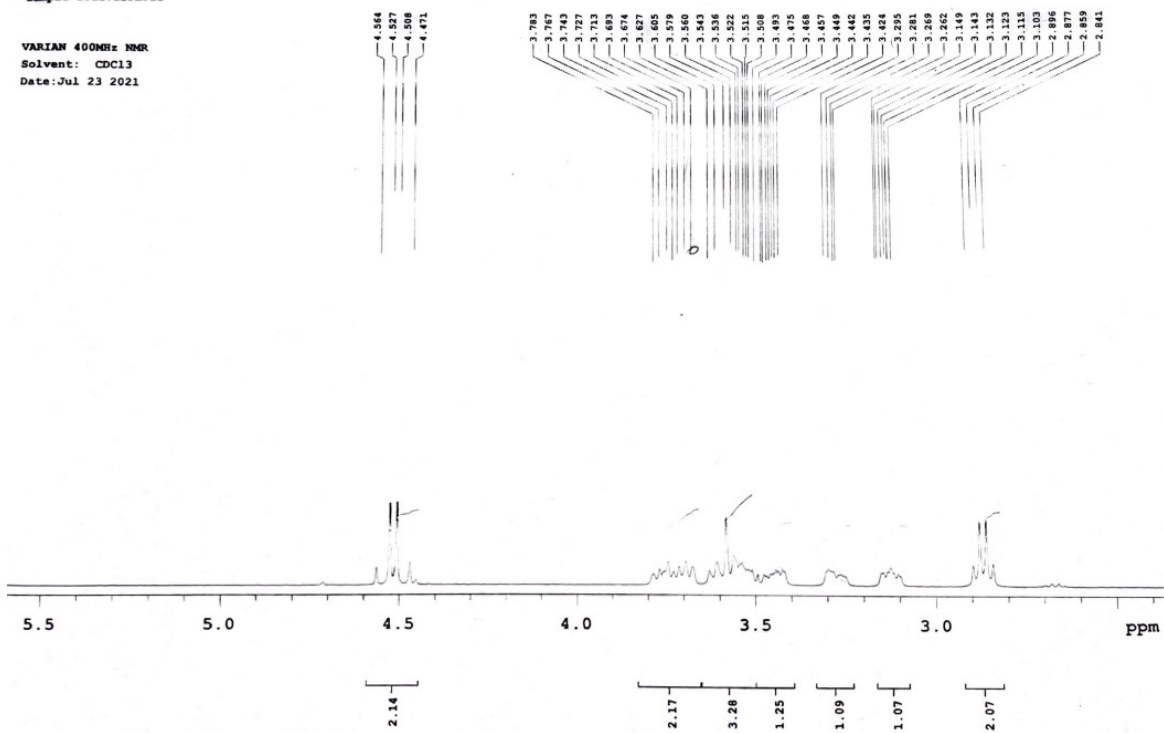

Sample code: SSPEP13

VARIAN 400MHz NMR  
Solvent: CDCl3  
Date: Jul 23 2021

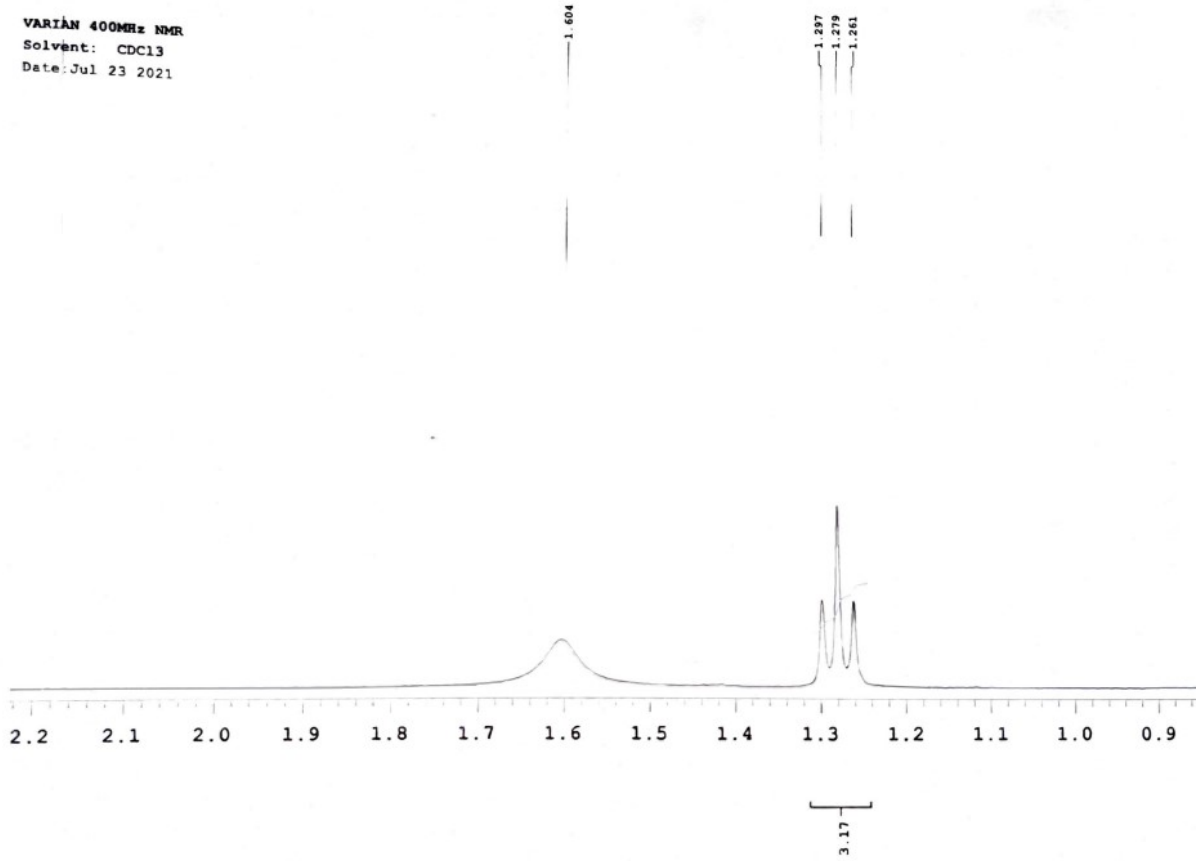

Sample code: SSPEP13-13C

VARIAN 400MHz NMR  
Solvent: CDCl3  
Date: Jul 24 2021

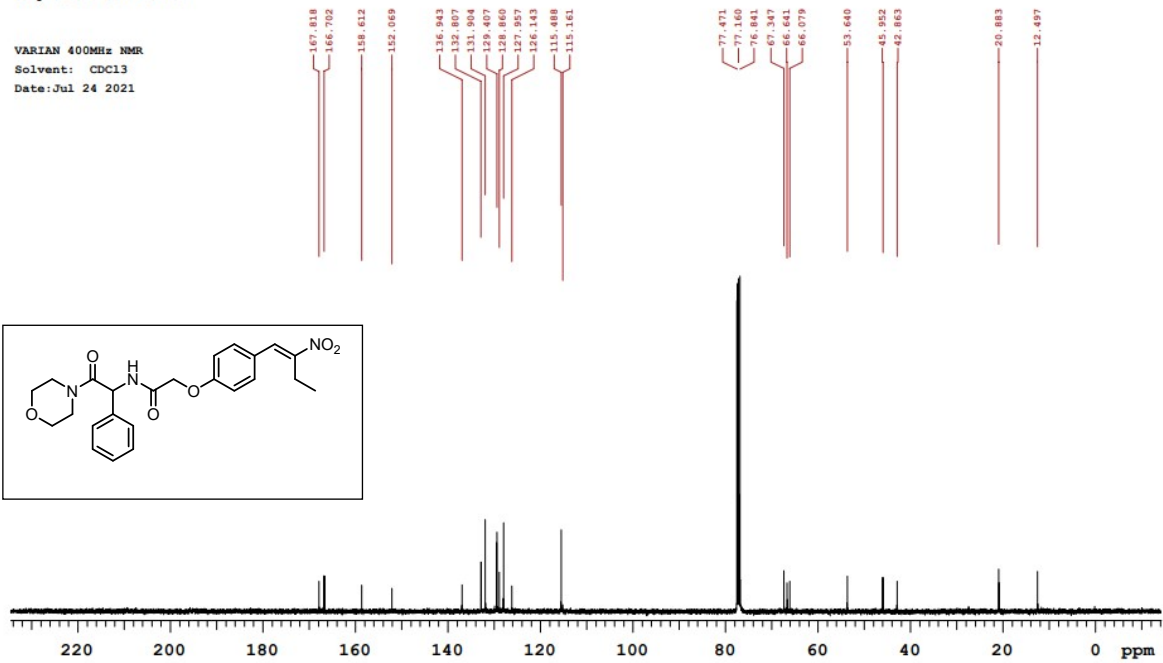

<sup>13</sup>C NMR spectra of the compound 14g

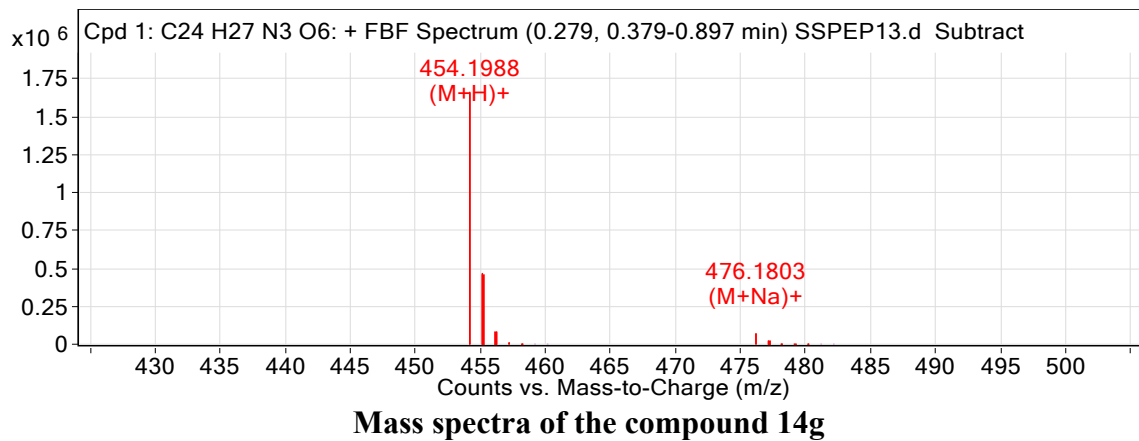

Sample code:SSPEP14

VARIAN 400MHz NMR  
Solvent: CDCl<sub>3</sub>  
Date:Jul 23 2021

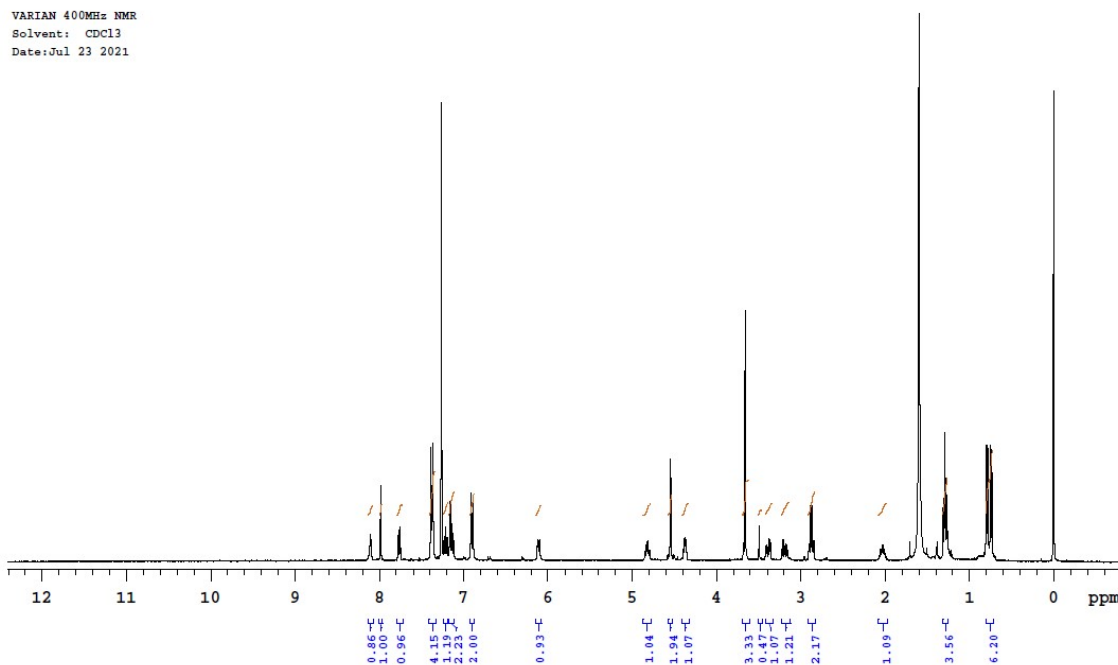

<sup>1</sup>H NMR for the compound 14h

# Expanded:

Sample code: SSPEP14

VARIAN 400MHz NMR  
Solvent: CDCl3  
Date: Jul 23 2021

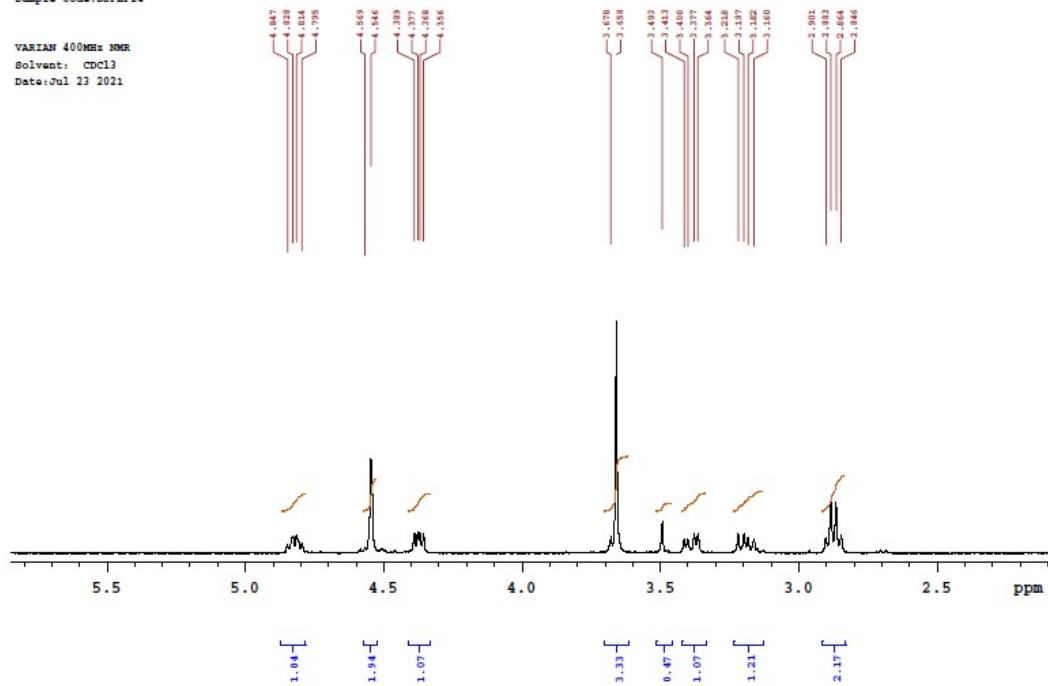

Plotname: SSPEP14\_PROTON\_01\_plot03

Sample code: SSPEP14

VARIAN 400MHz NMR  
Solvent: CDCl3  
Date: Jul 23 2021

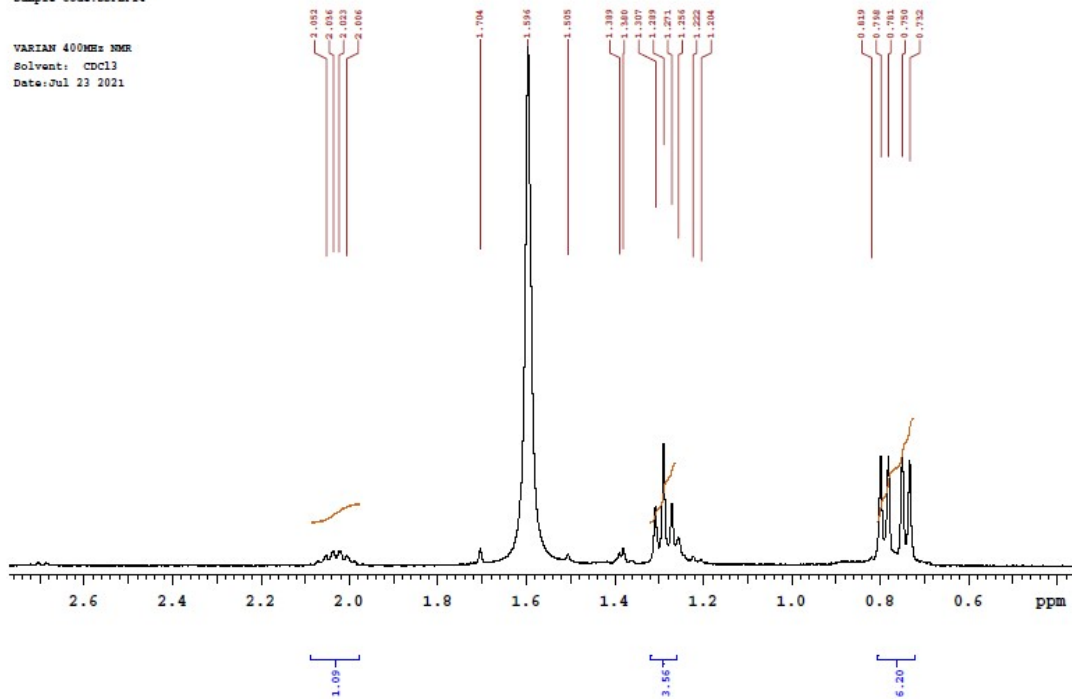

Plotname: SSPEP14\_PROTON\_01\_plot04

Sample code:SSPEP14-13C  
13C NMR  
VARIAN 400MHz NMR  
Solvent: CDCl3  
Date:Jul 23 2021

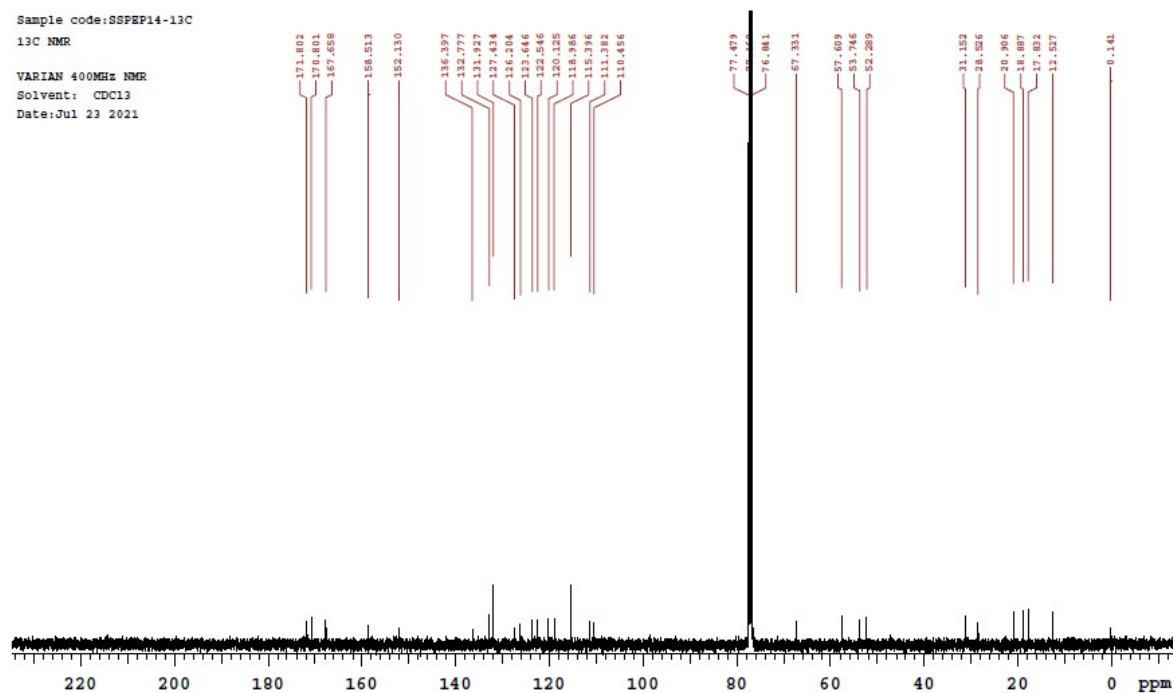

**13C NMR spectra of the compound 14h**

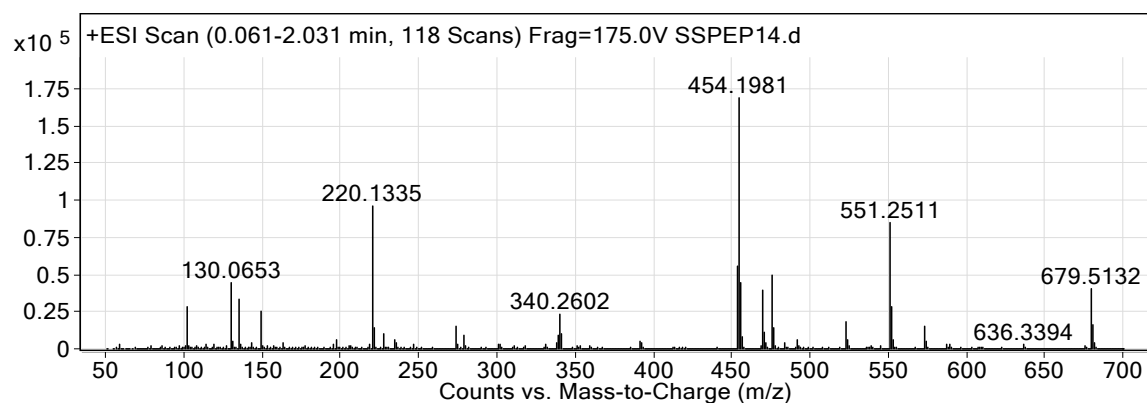

**Mass spectra for the compound 14h**

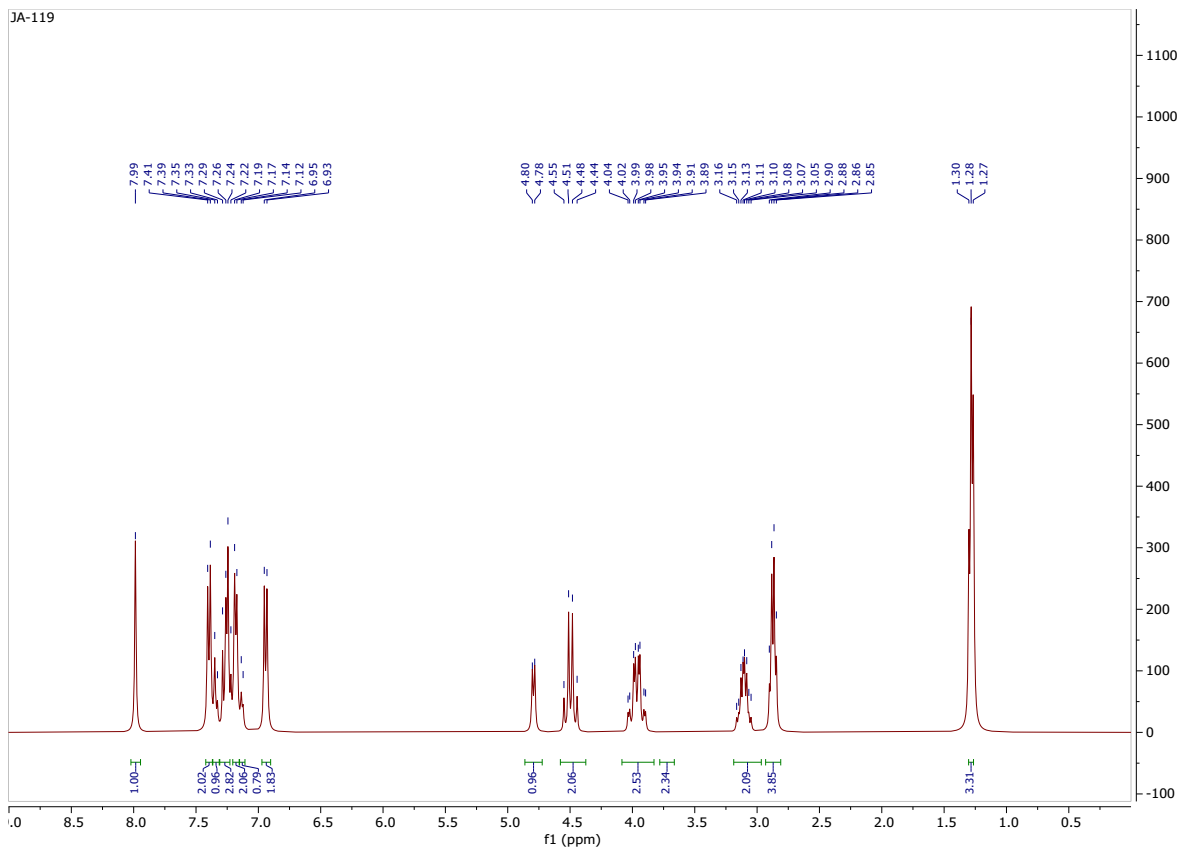

**<sup>1</sup>H NMR spectra of the compound 14i**

**Expanded:**

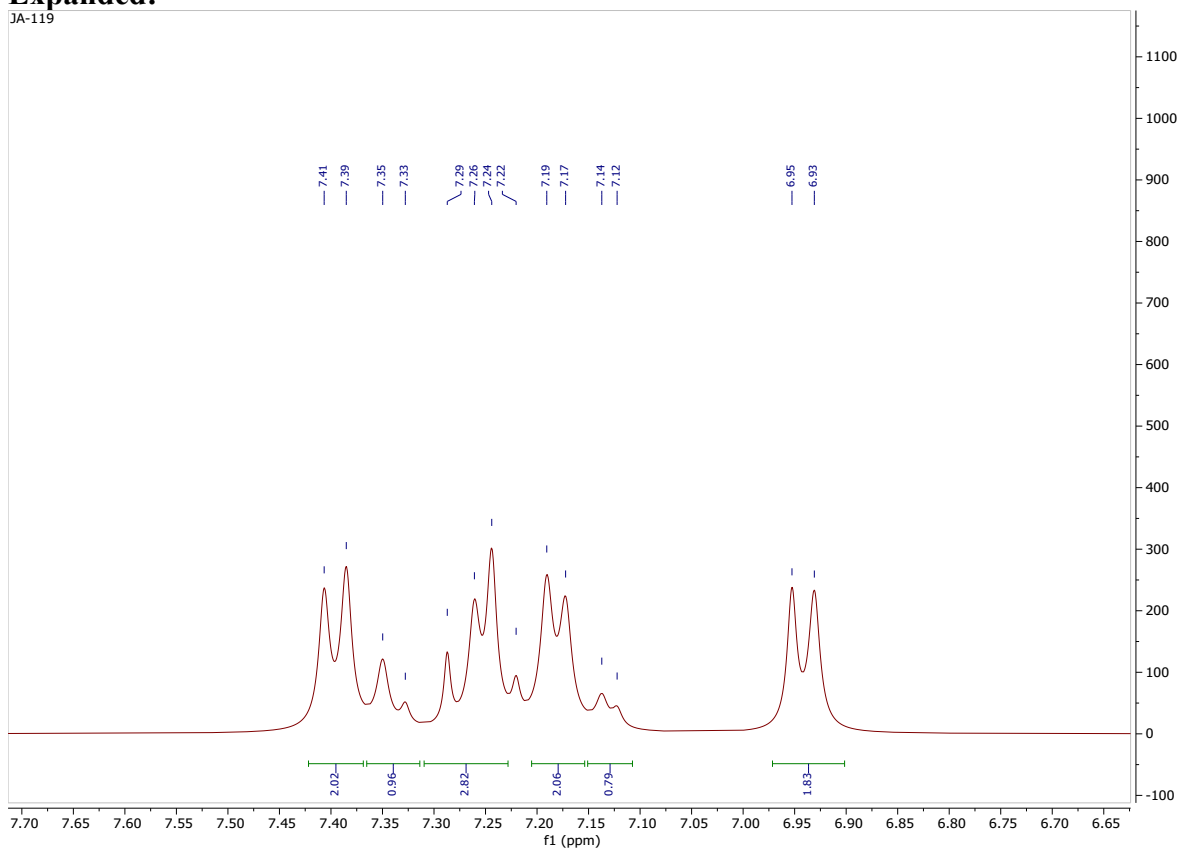

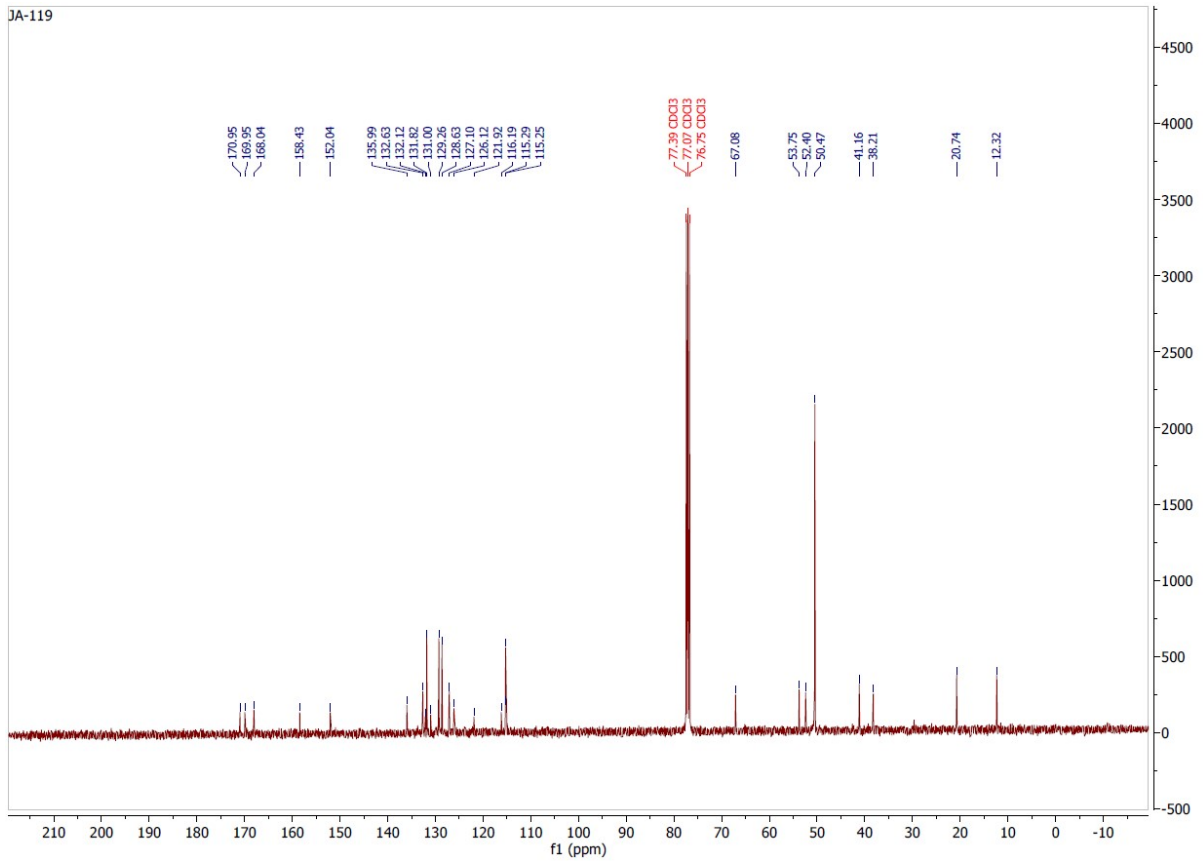

**<sup>13</sup>C NMR spectra of compound 14i**

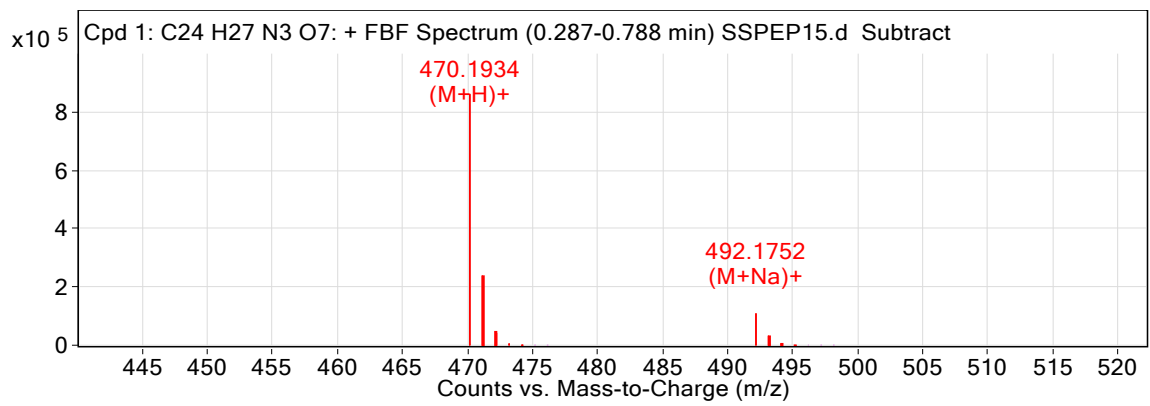

**Mass spectra for the compound 14i**



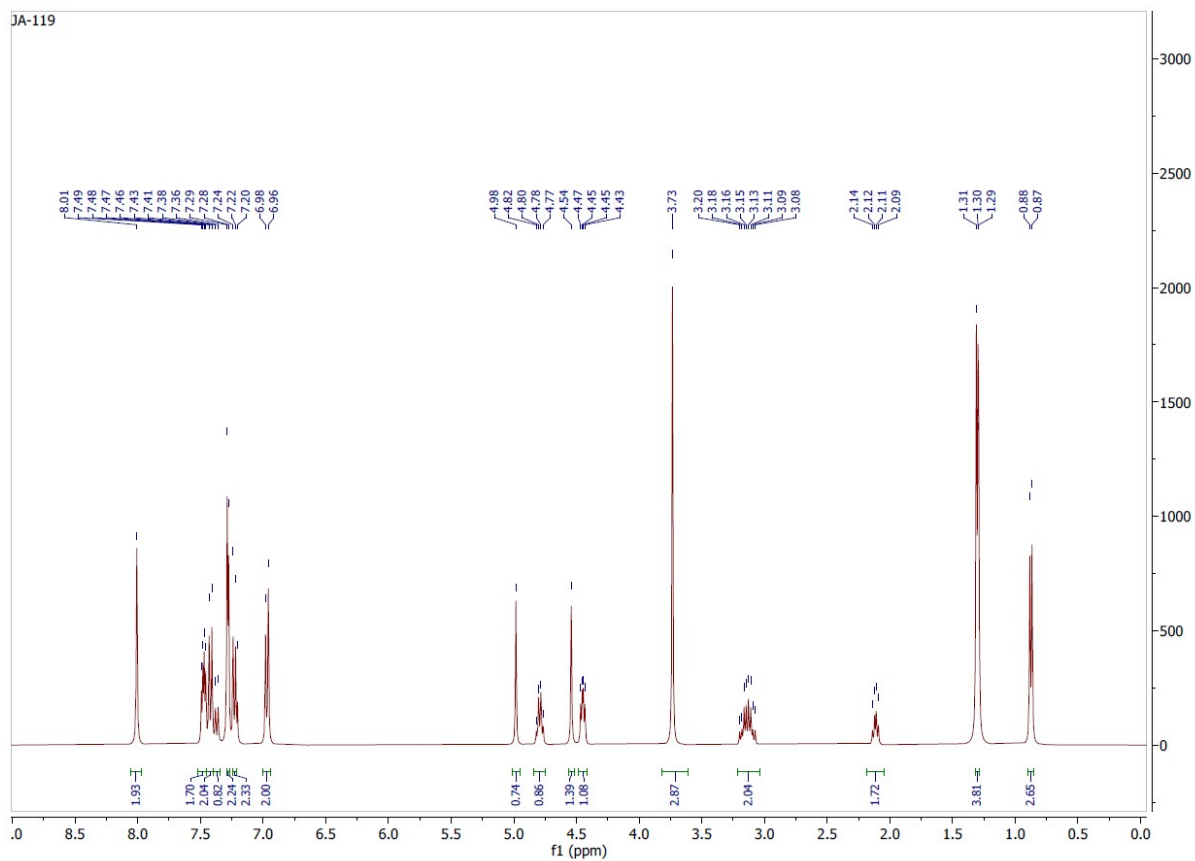

**<sup>1</sup>H NMR spectra of compound 14j**

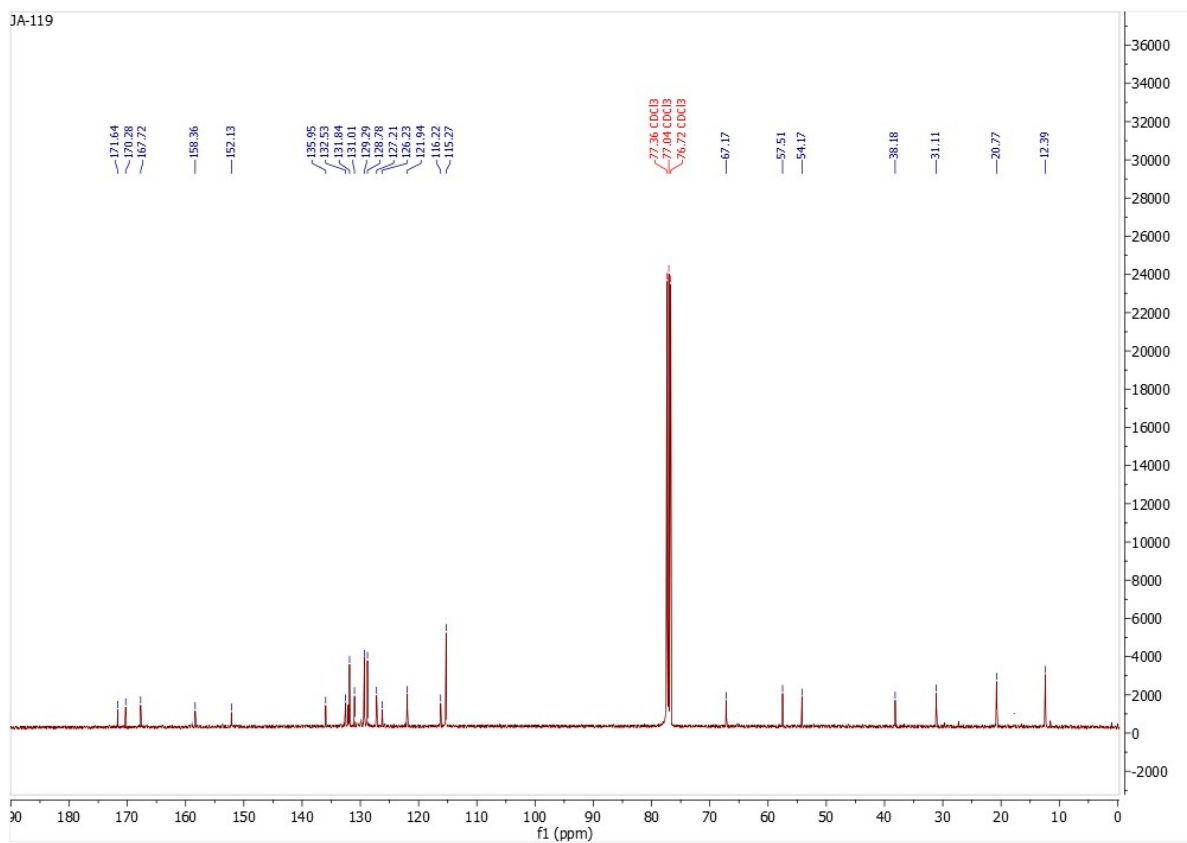

**<sup>13</sup>C spectra of compound 14j**

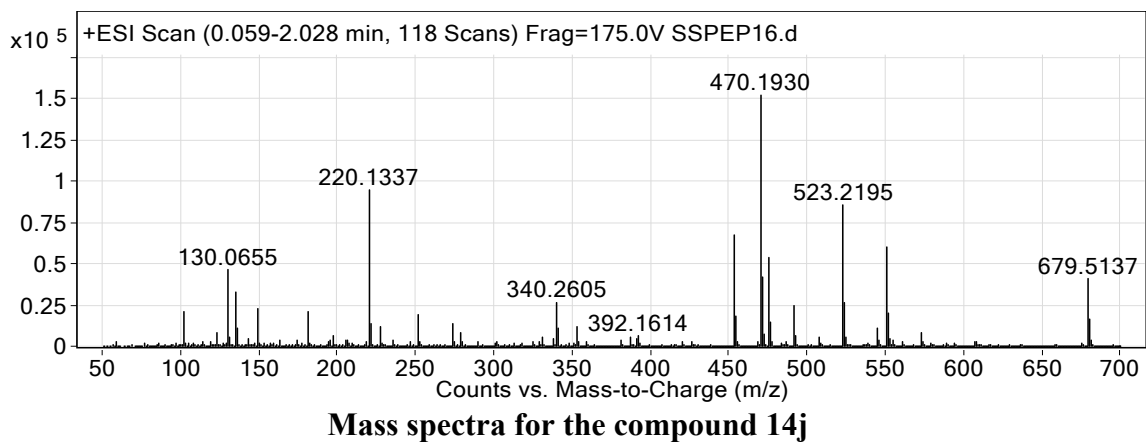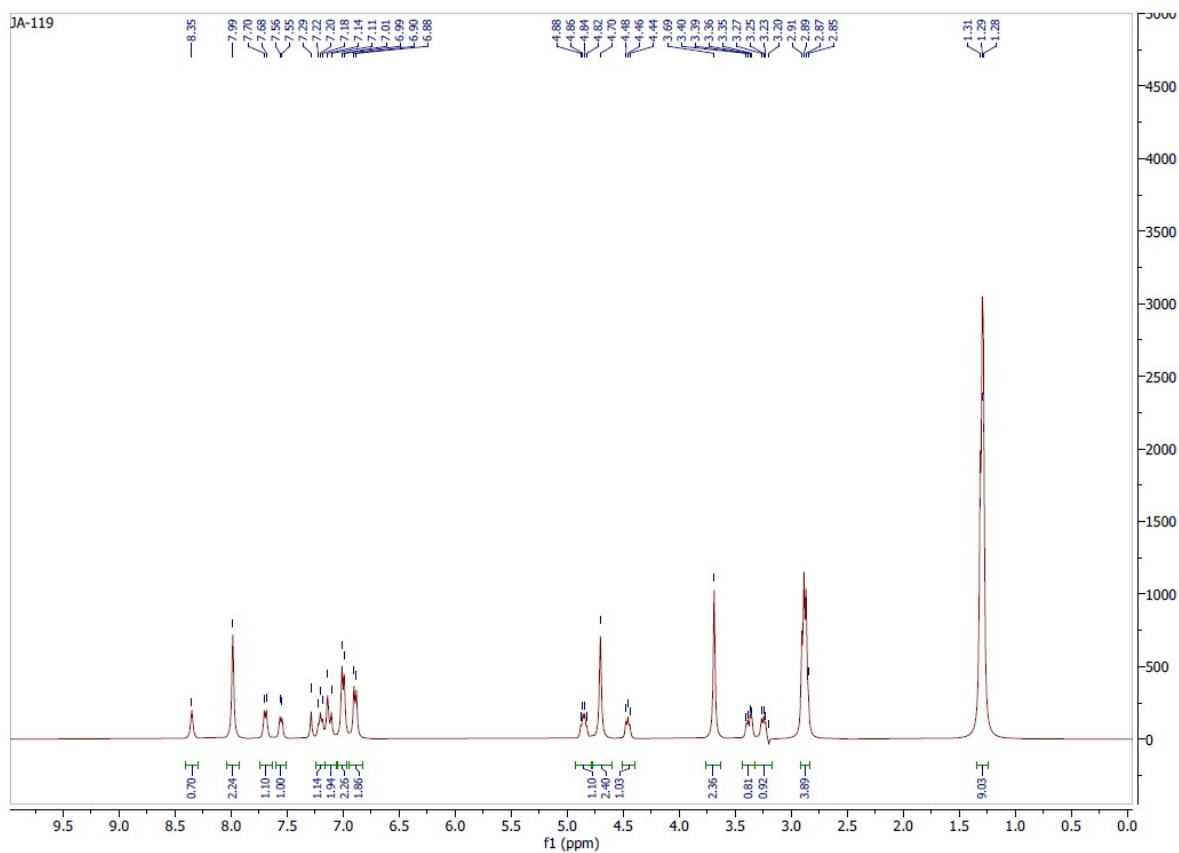

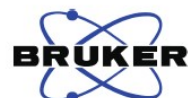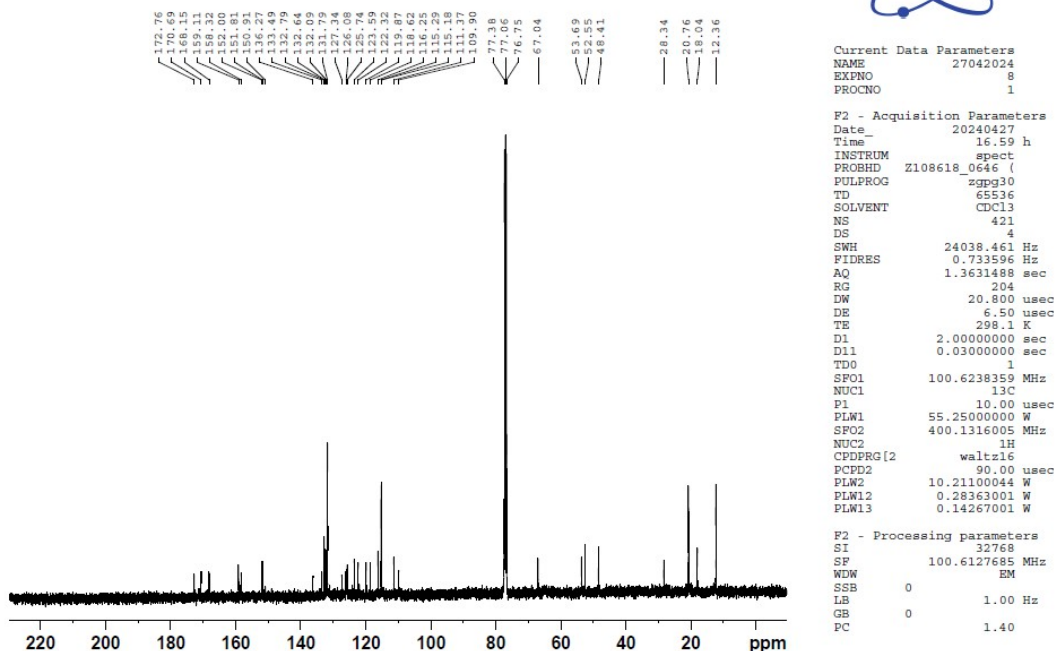

<sup>13</sup>C NMR spectra for compound 14k

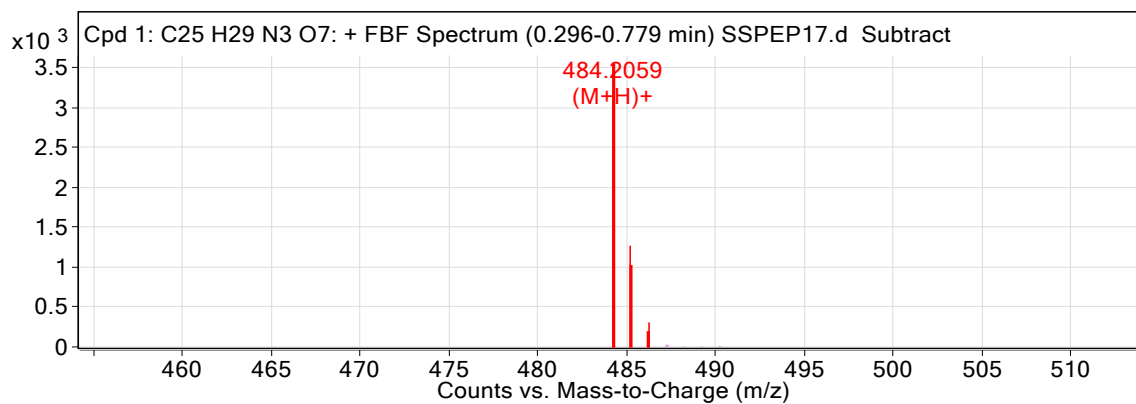

Mass spectra for the compound 14k

# NMR Spectra for starting materials:

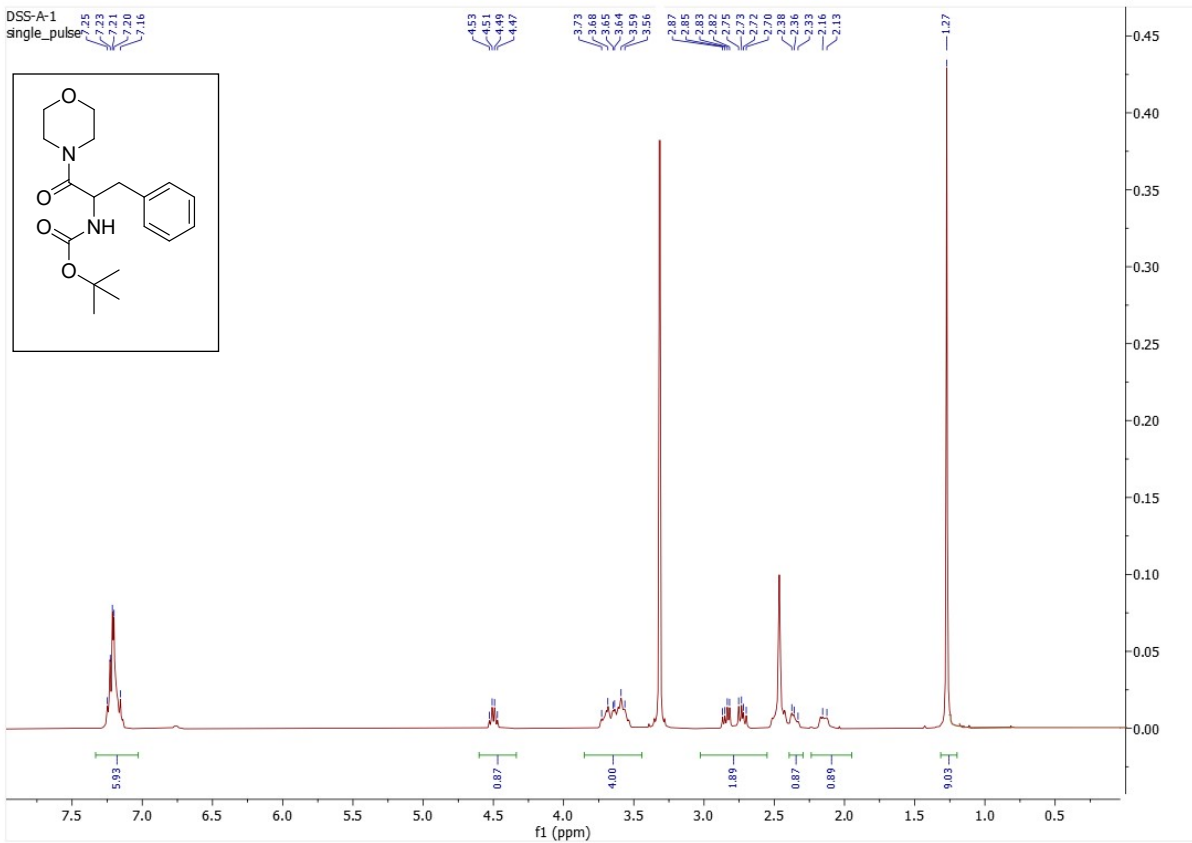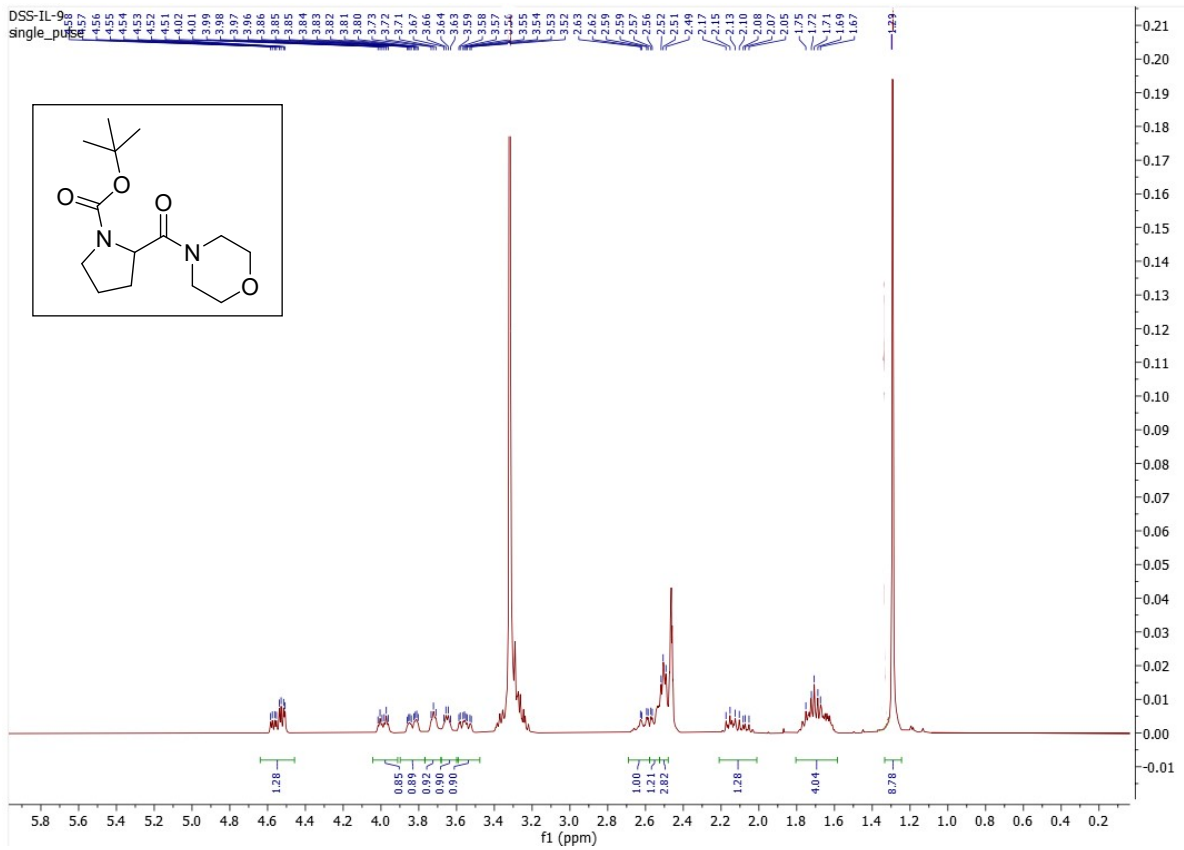

# Compound 10:

FR JH SNS S SHAFI SS 51

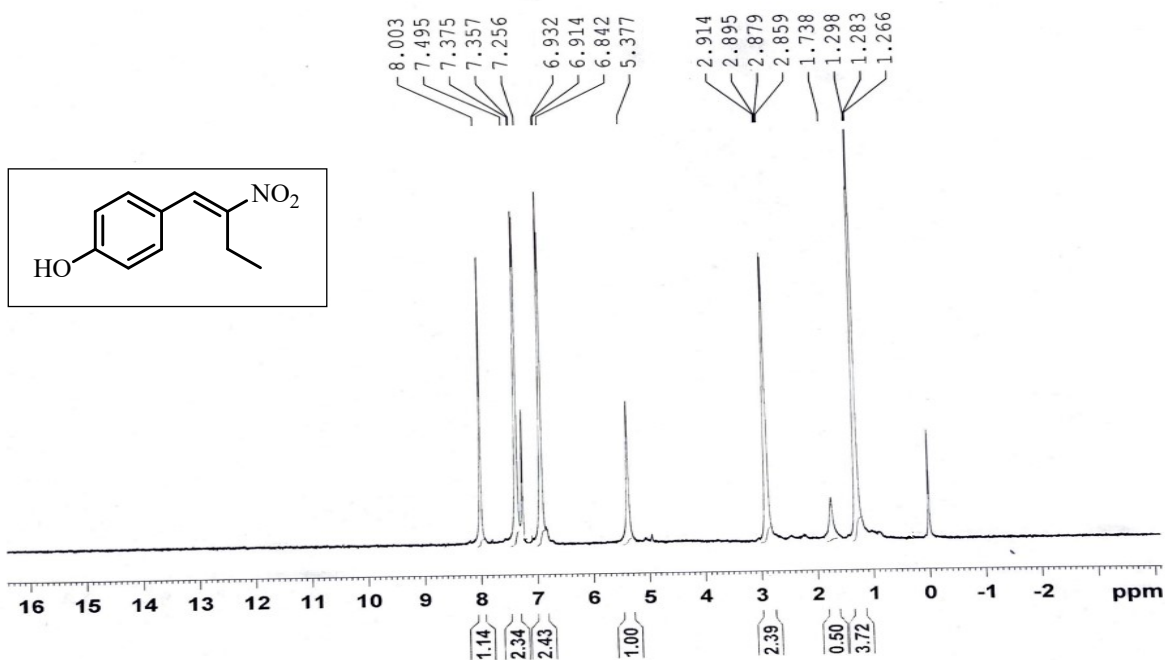

# Compound 11

ss3 dms0

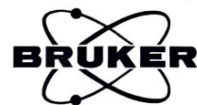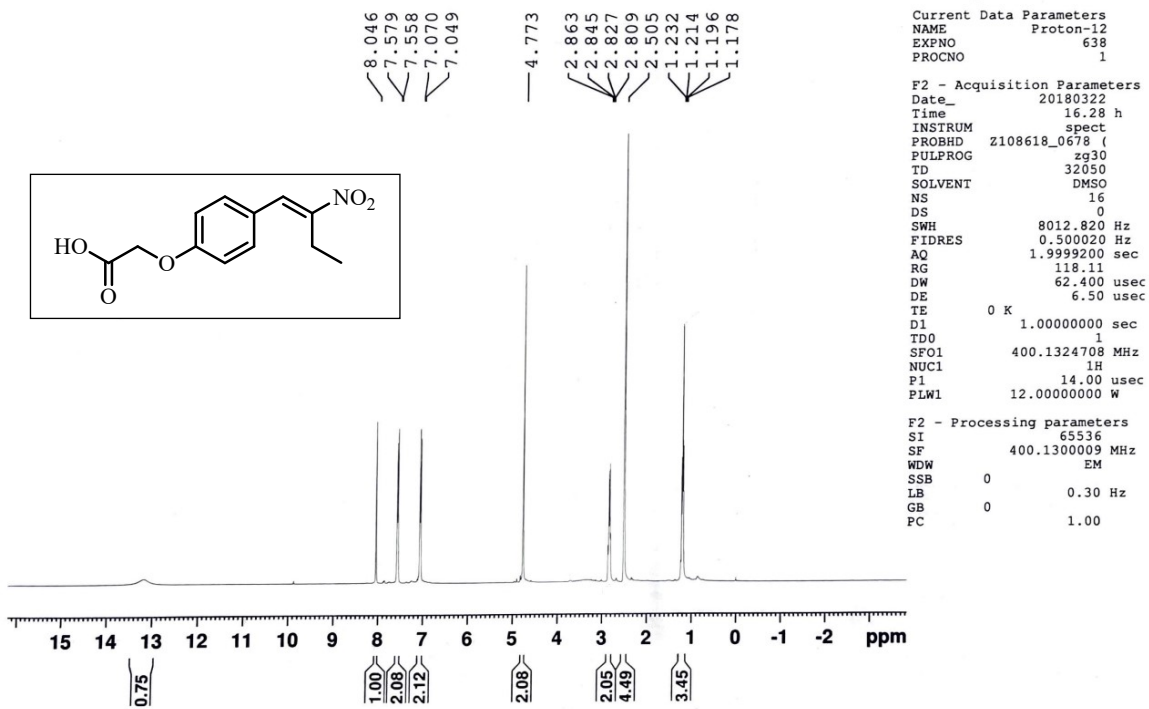

Supplement: d4ra06510g1.pdf [file d4ra06510g1.pdf]
